# Supplementary material for: Sunlight Induced and Recyclable g-C3N4 Catalyzed C-H Sulfenylation of Quinoxalin-2(1H)-Ones
Source: MDPI journal article supplement (doi:10.3390/molecules27155044), 2022-08-08
Supplement: s1 [file s1]

# **Sunlight induced and Recyclable g-C<sub>3</sub>N<sub>4</sub> Catalyzed C-H Sulfenylation of Quinoxalin-2(1*H*)-ones**

Sha Peng, Jiao Liu, Li-Hua Yang , and Long-Yong Xie \*

College of Chemistry and Bioengineering, Hunan University of Science and Engineering, Hunan, 425100, China

*E-mail:* xielongyong@huse.edu.cn

## $^1\text{H}$ and $^{13}\text{C}$ NMR spectra of products

### 3-(isopropylthio)-1-methylquinoxalin-2(1H)-one (3aa)

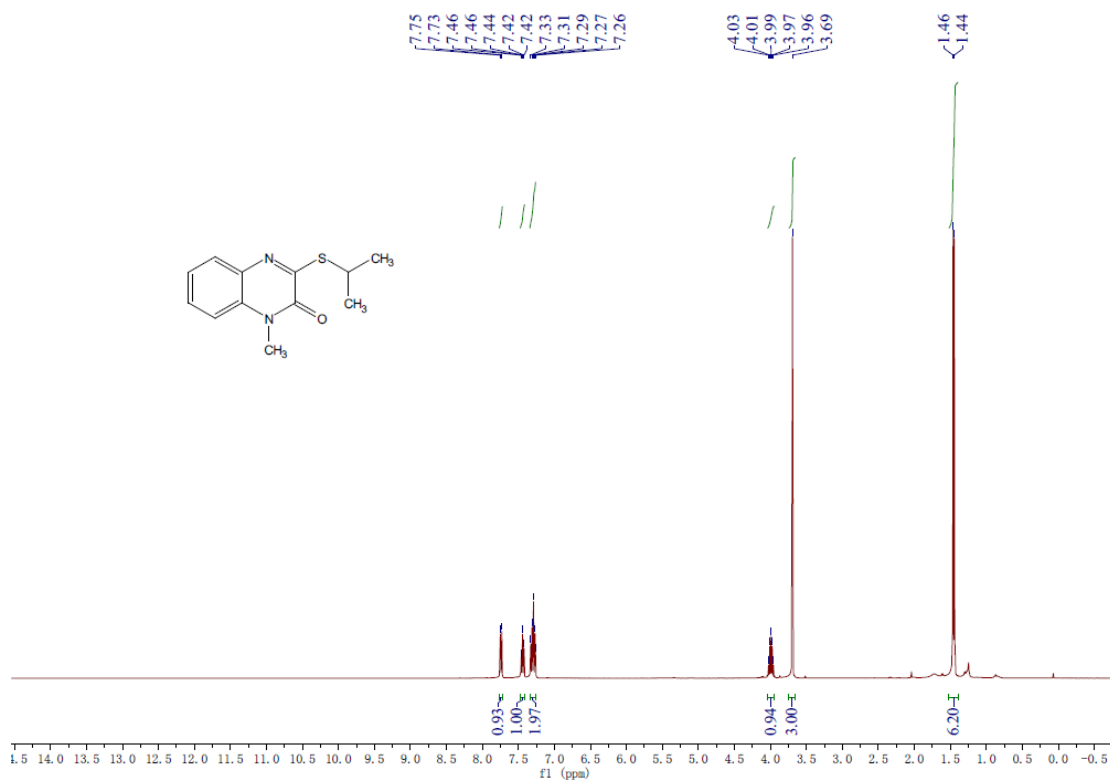

### $^1\text{H}$ spectra of 3aa

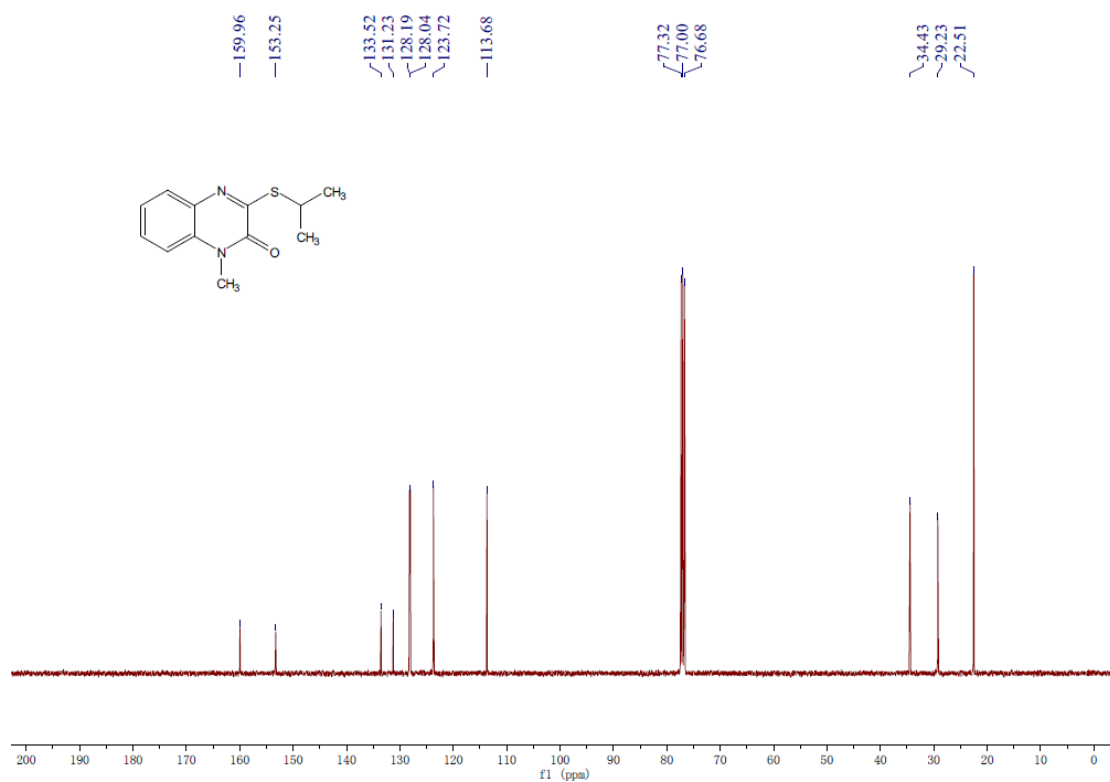

### $^{13}\text{C}$ spectra of 3aa

**1-ethyl-3-(isopropylthio)quinoxalin-2(1H)-one (3ba)**

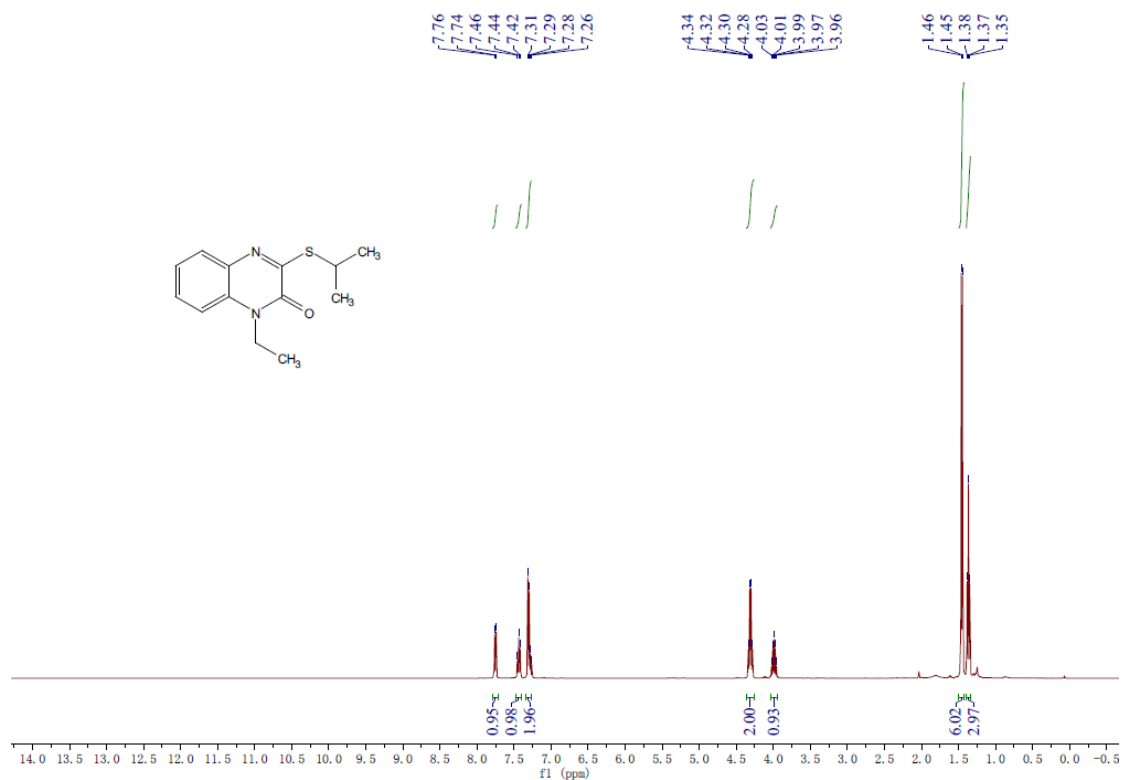

**<sup>1</sup>H spectra of 3ba**

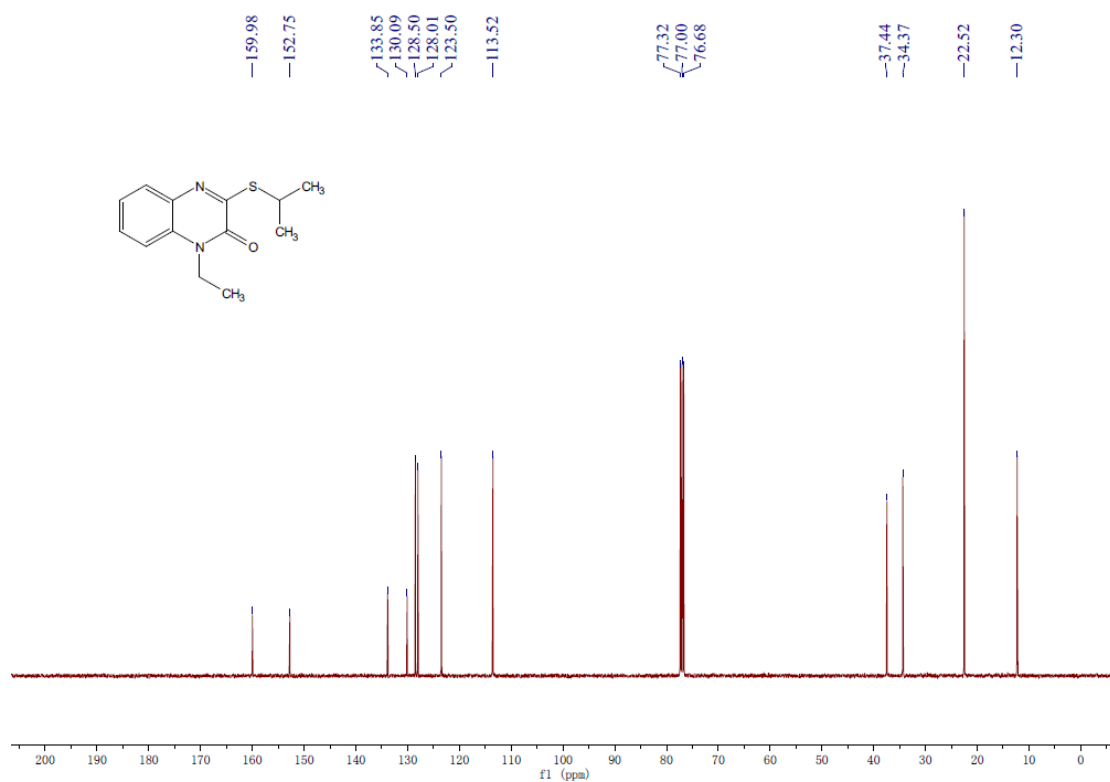

**<sup>13</sup>C spectra of 3ba**

**3-(isopropylthio)-1-pentylquinoxalin-2(1H)-one (3ca)**

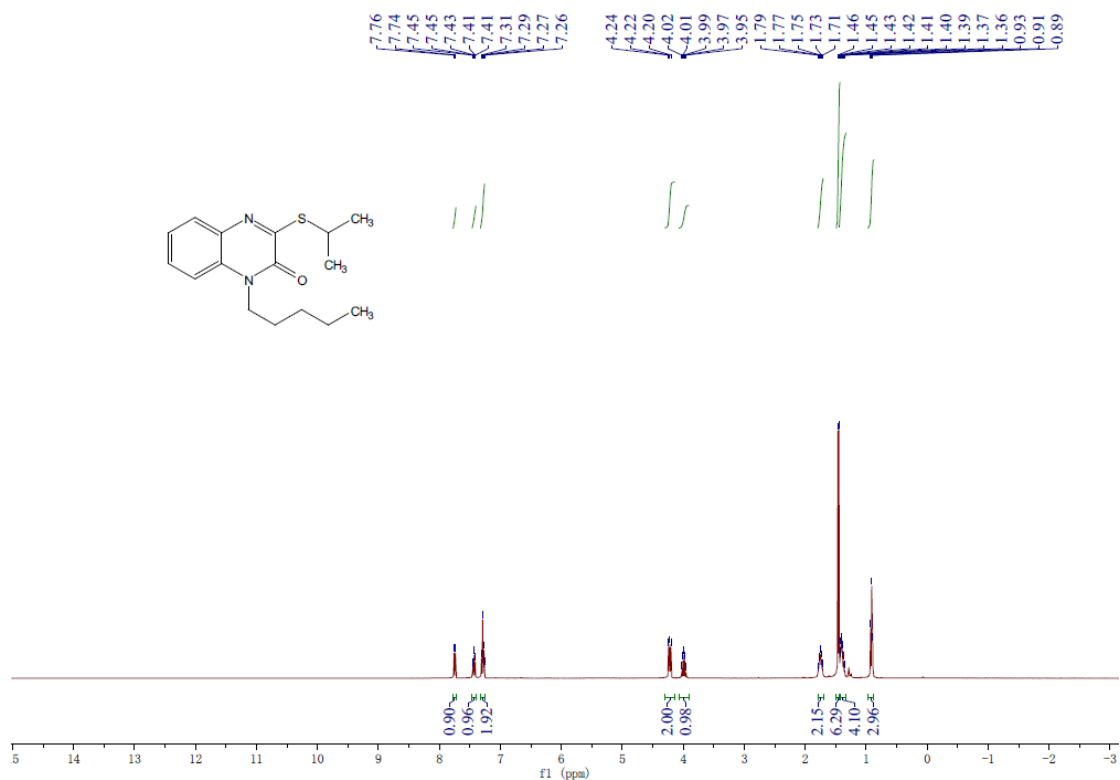

<sup>1</sup>H spectra of 3ca

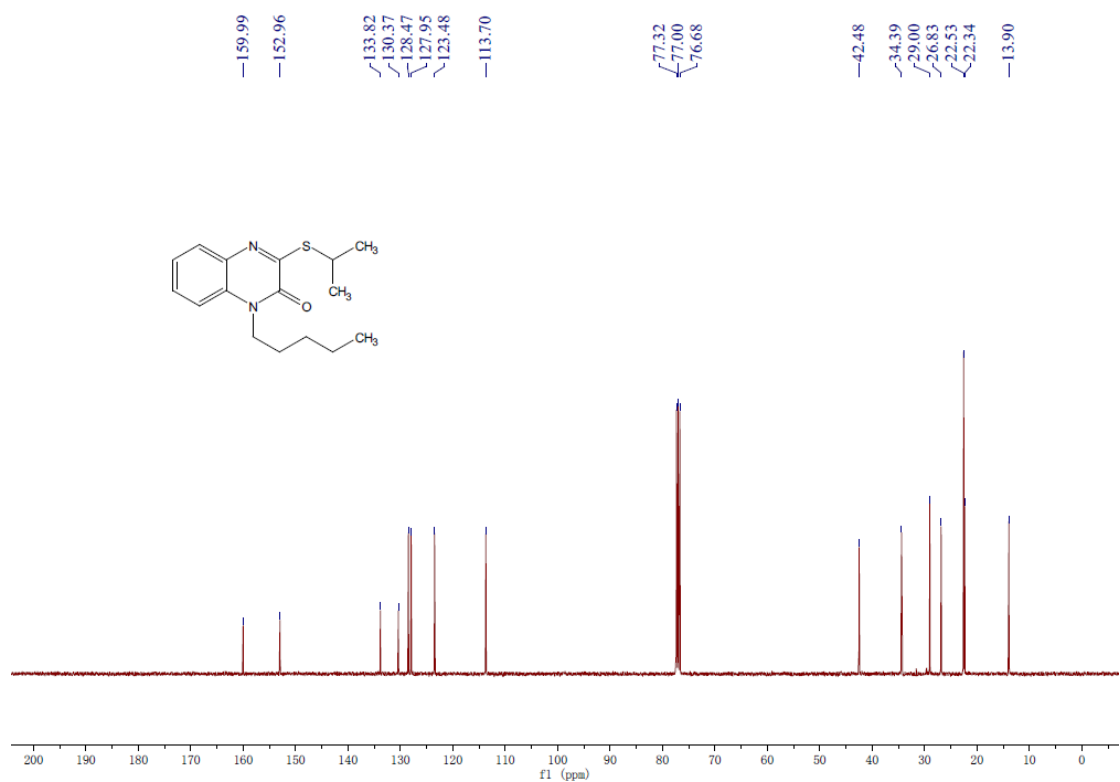

<sup>13</sup>C spectra of 3ca

benzyl-3-(isopropylthio)quinoxalin-2(1*H*)-one (3da)

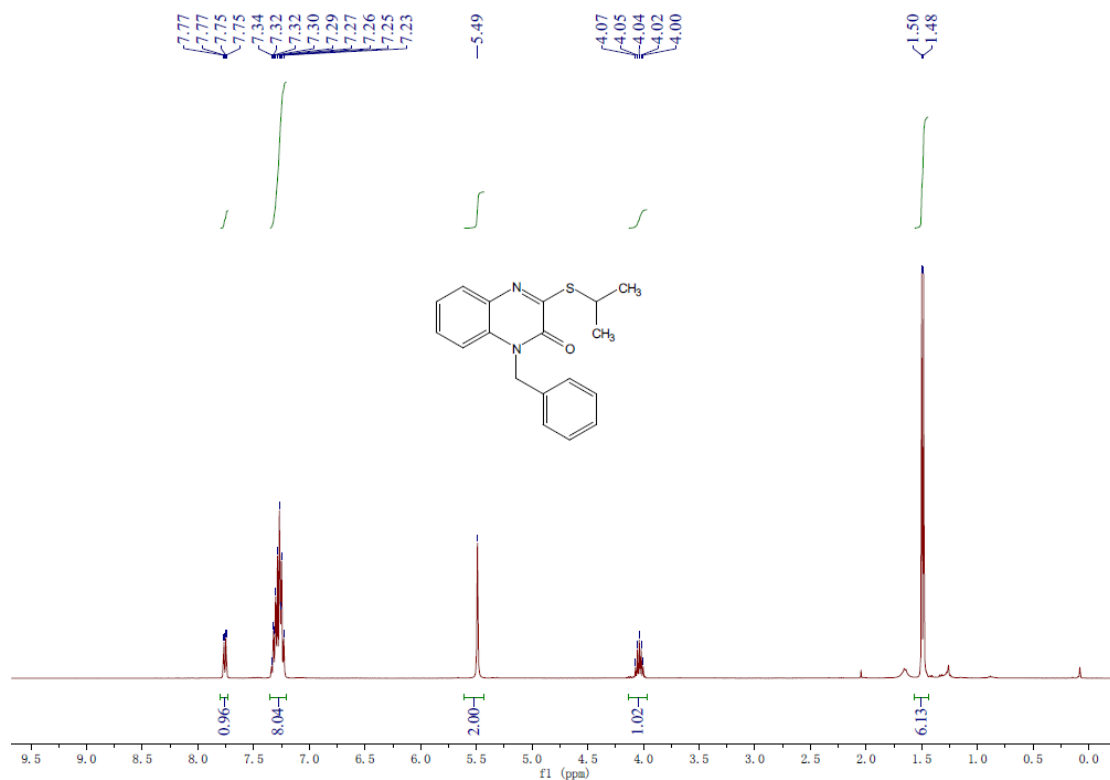

<sup>1</sup>H spectra of 3da

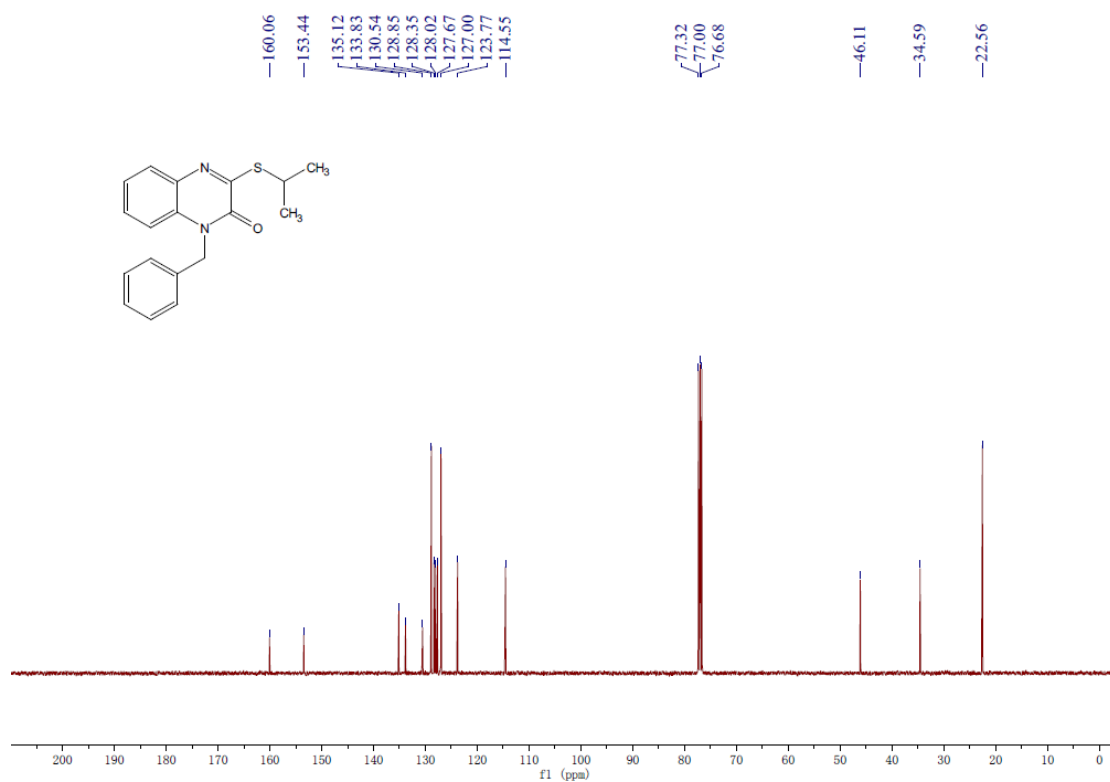

<sup>13</sup>C spectra of 3da

allyl-3-(isopropylthio)quinoxalin-2(1H)-one (3ea)

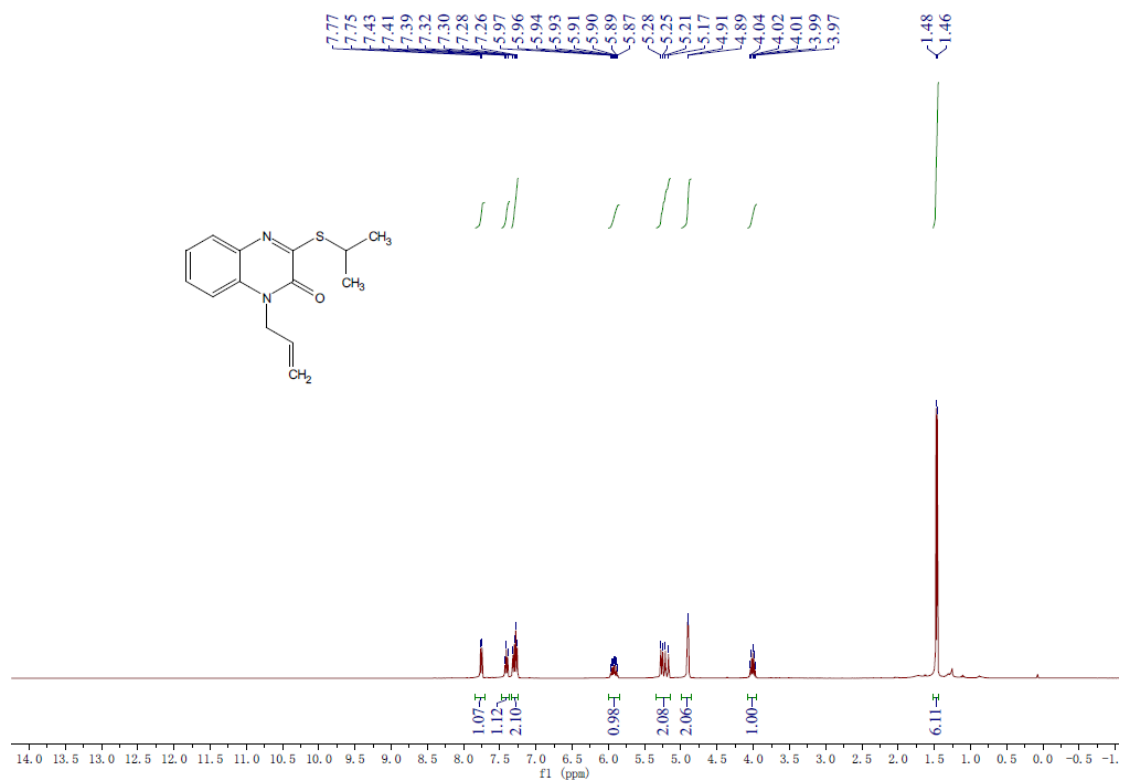

<sup>1</sup>H spectra of 3ea

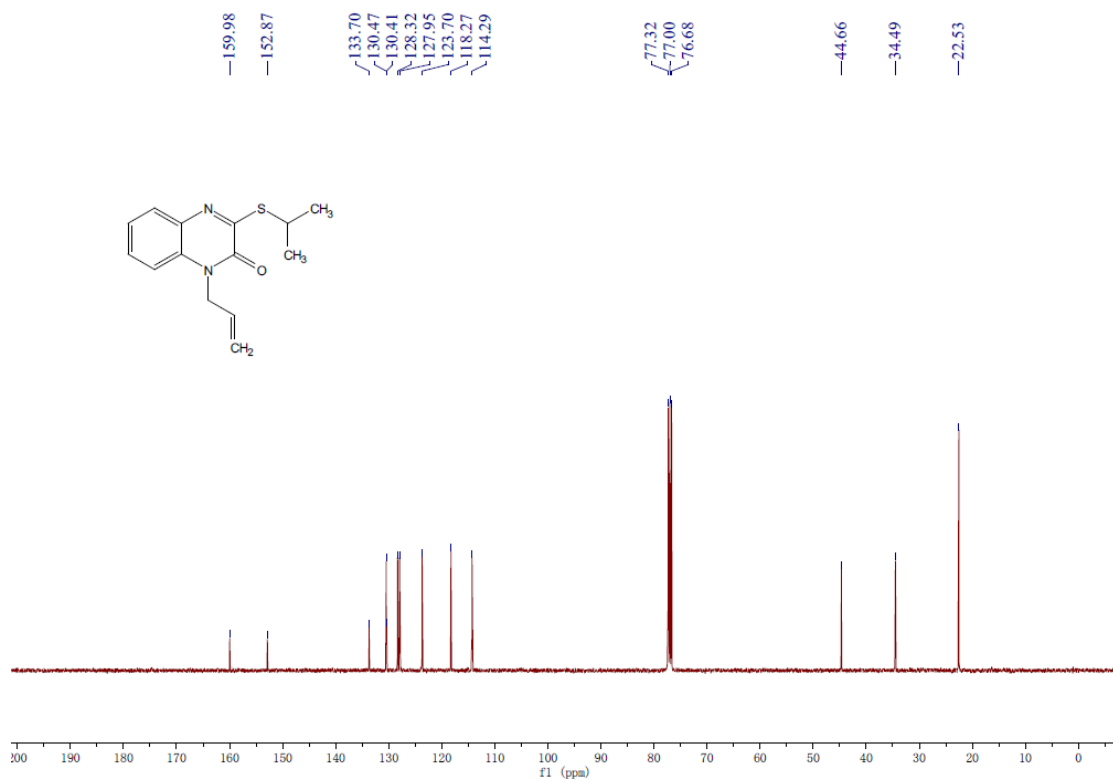

<sup>13</sup>C spectra of 3ea

**3-(isopropylthio)-1-(prop-2-yn-1-yl)quinolin-2(1H)-one (3fa)**

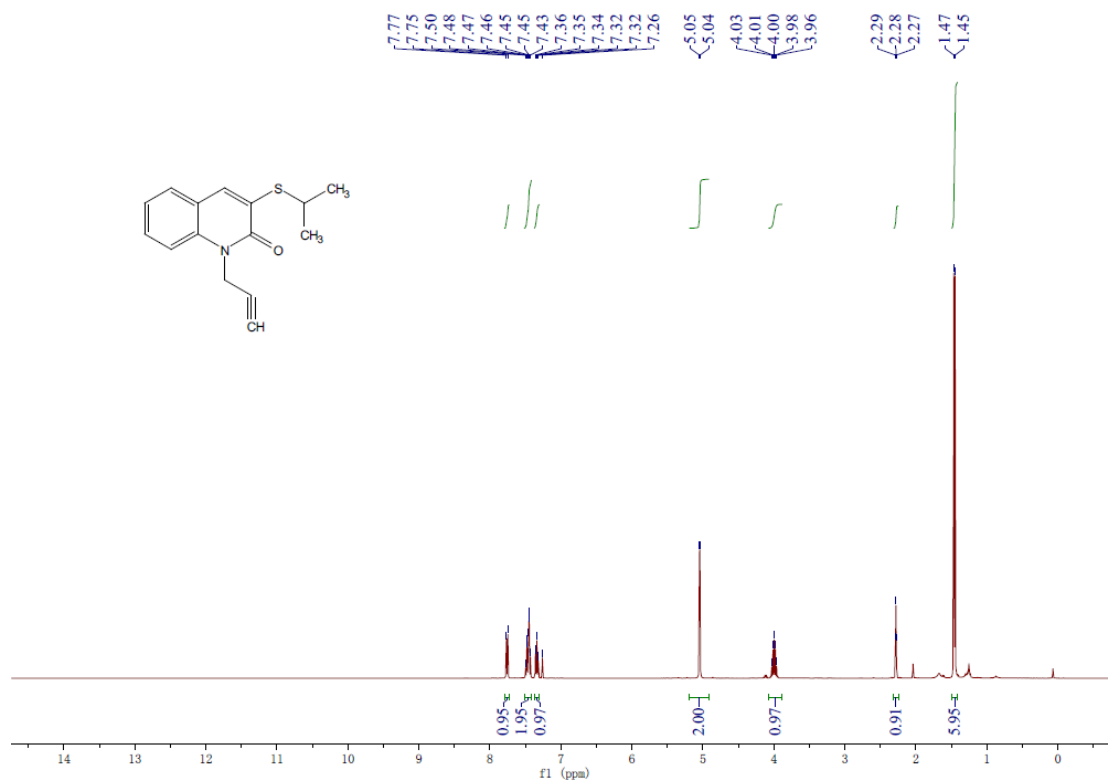

<sup>1</sup>H spectra of **3fa**

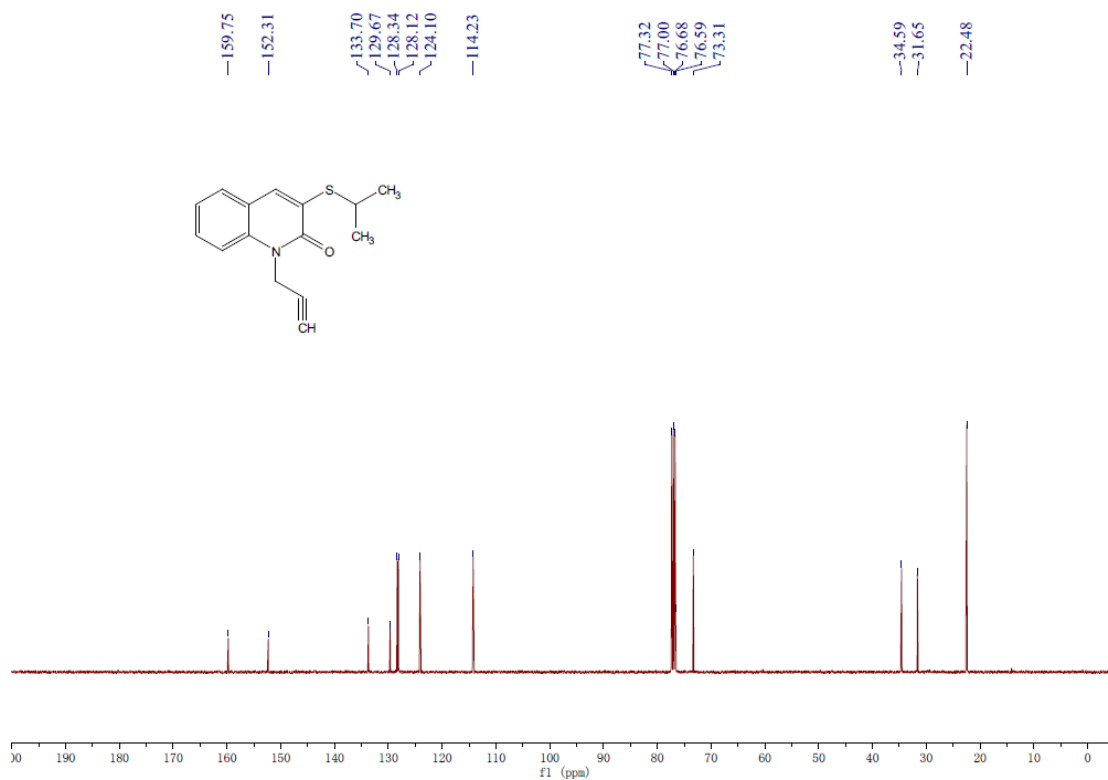

<sup>13</sup>C spectra of **3fa**

ethyl 2-(3-(isopropylthio)-2-oxoquinoxalin-1(2*H*)-yl)acetate (**3ga**)

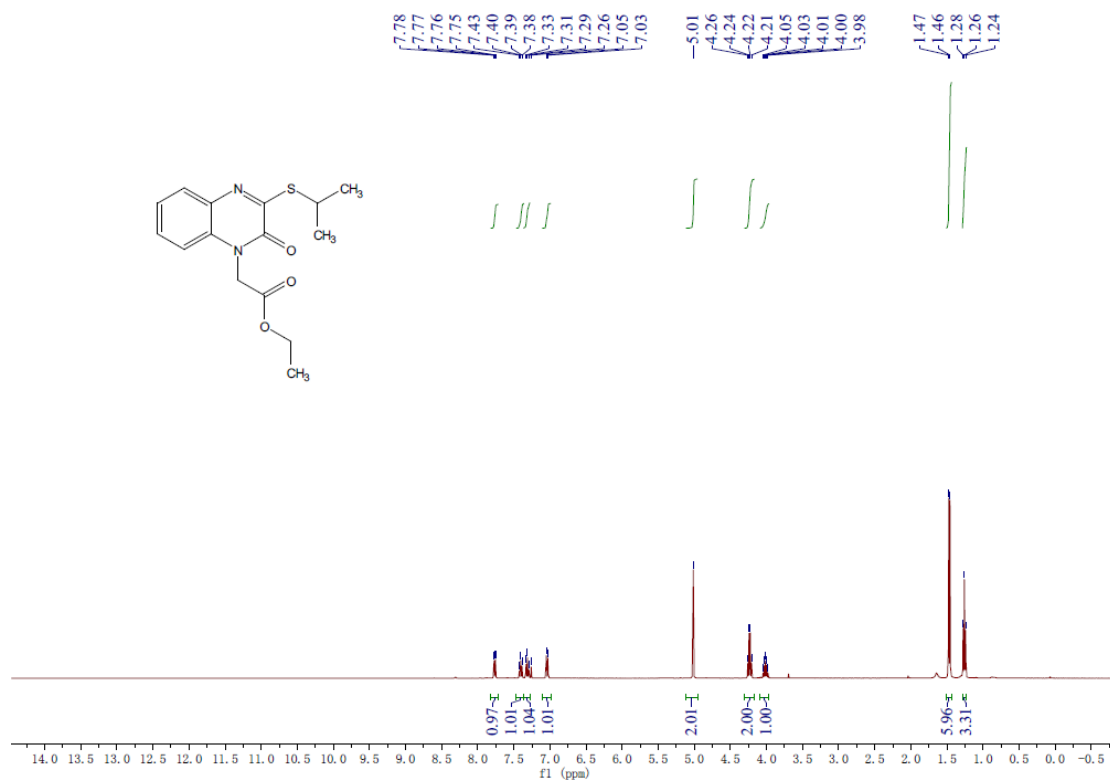

<sup>1</sup>H spectra of **3ga**

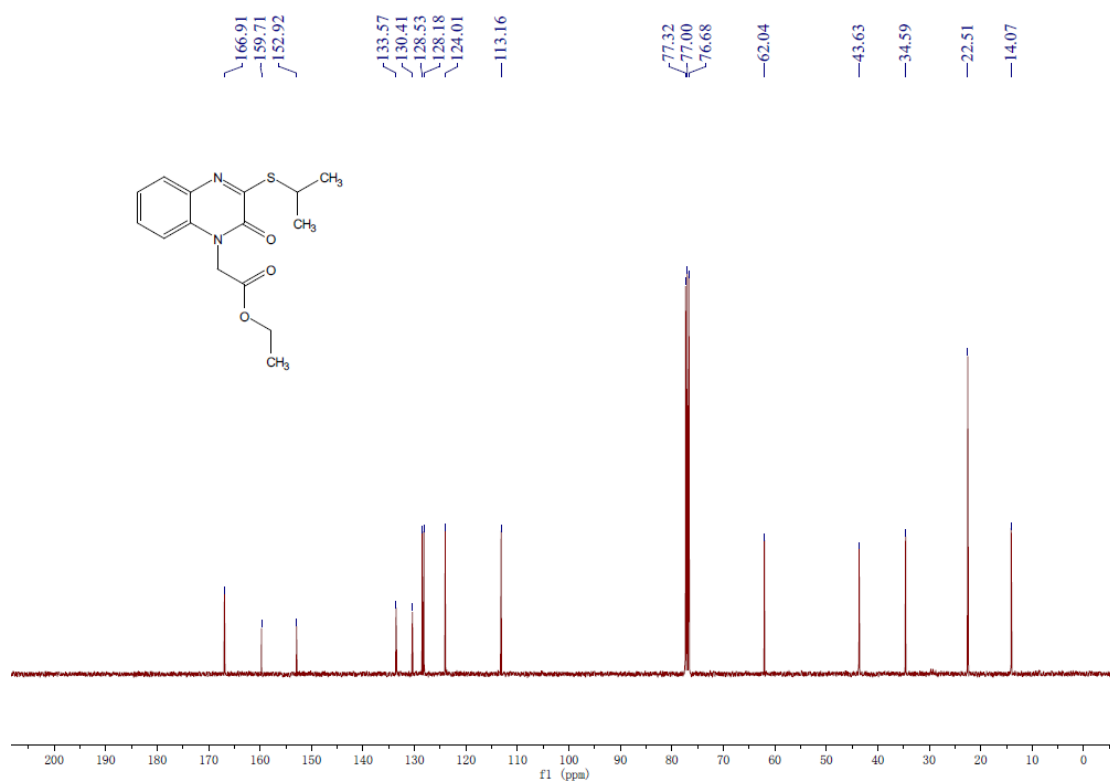

<sup>13</sup>C spectra of **3ga**



**3-(isopropylthio)-1-(2-oxo-2-phenylethyl)quinoxalin-2(1H)-one (3ha)**

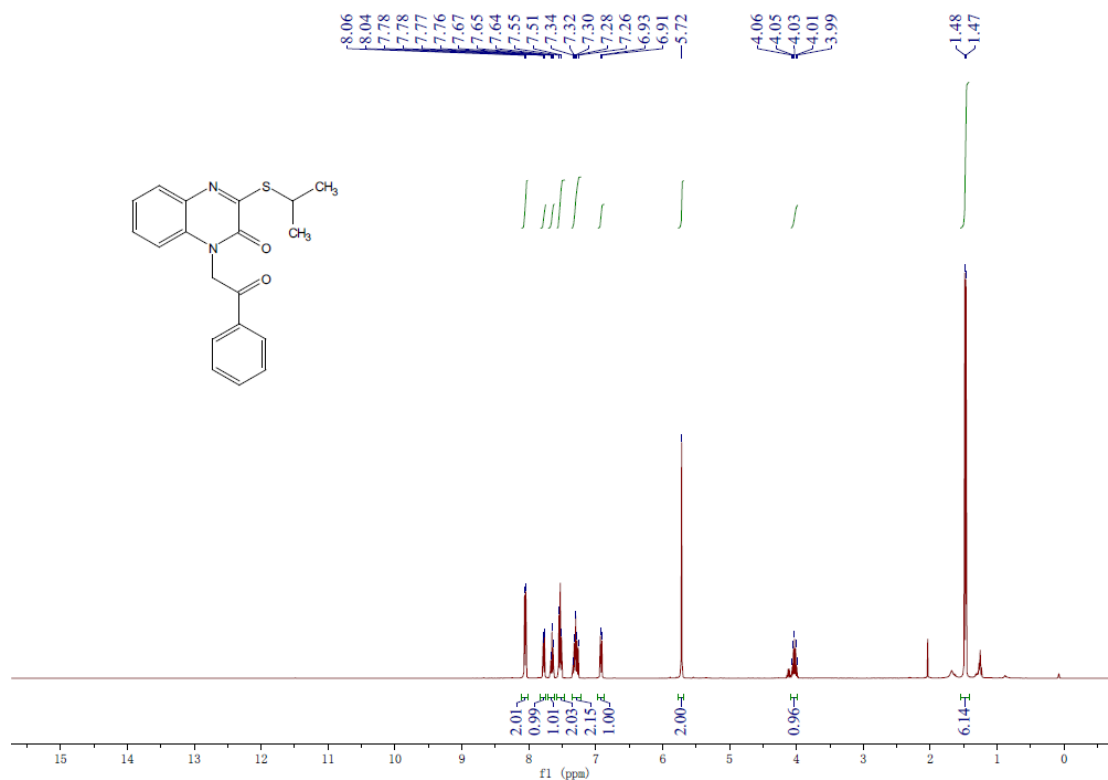

<sup>1</sup>H spectra of **3ha**

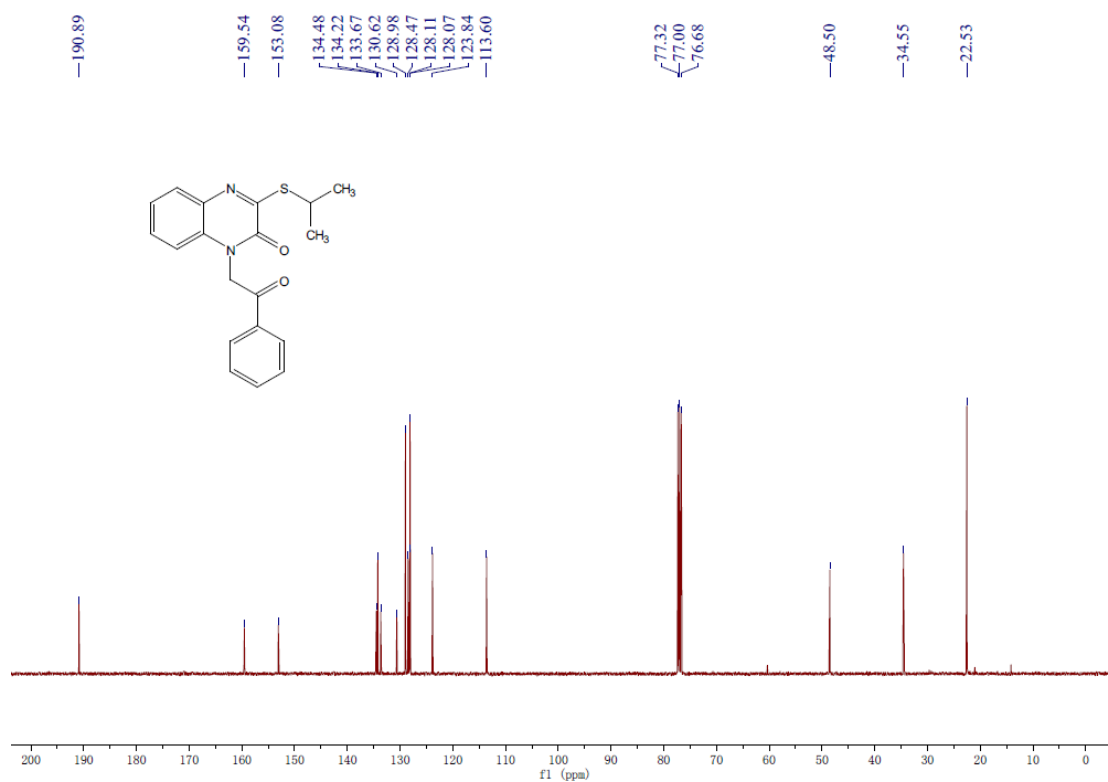

<sup>13</sup>C spectra of **3ha**

**3-(isopropylthio)-1-phenylquinoxalin-2(1H)-one (3ia)**

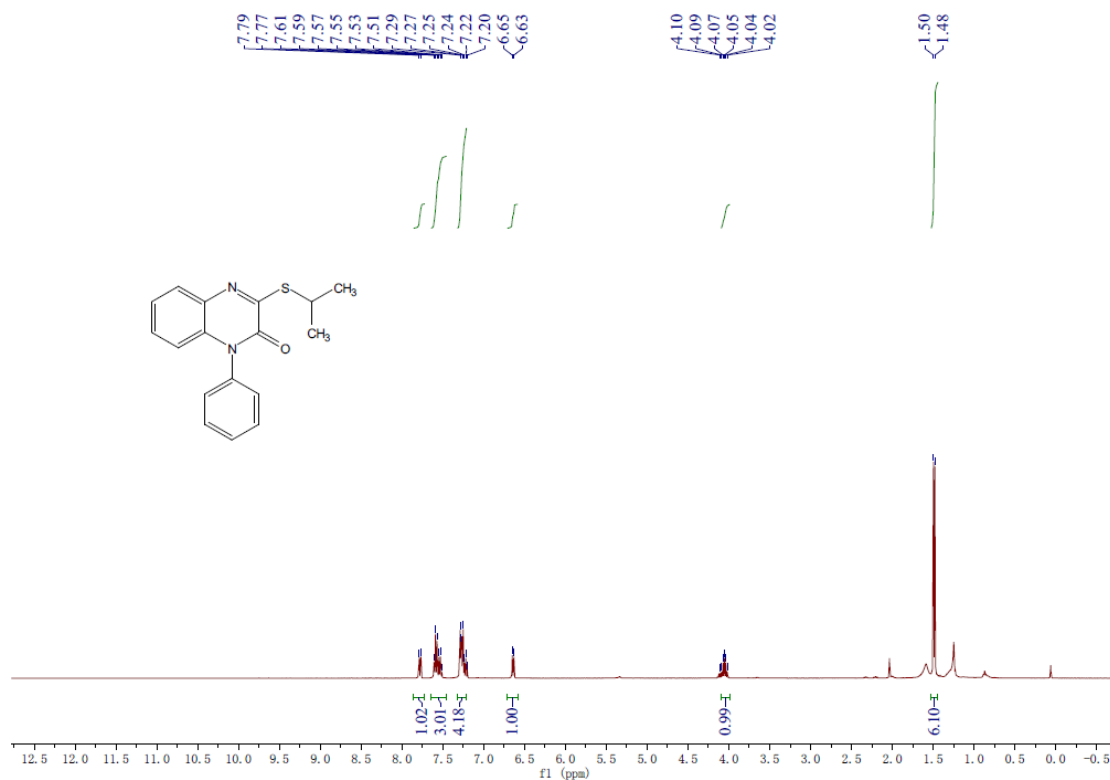

<sup>1</sup>H spectra of **3ia**

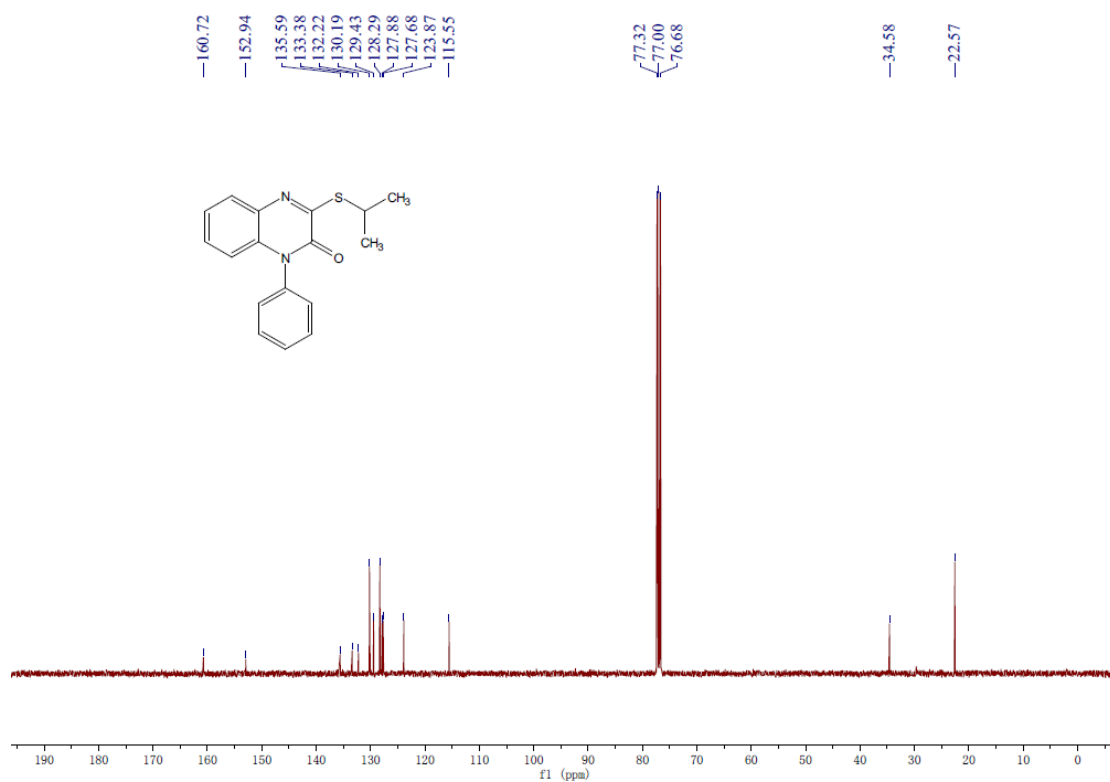

<sup>13</sup>C spectra of **3ia**

**5-chloro-3-(isopropylthio)-1-methylquinoxalin-2(1H)-one (3ja)**

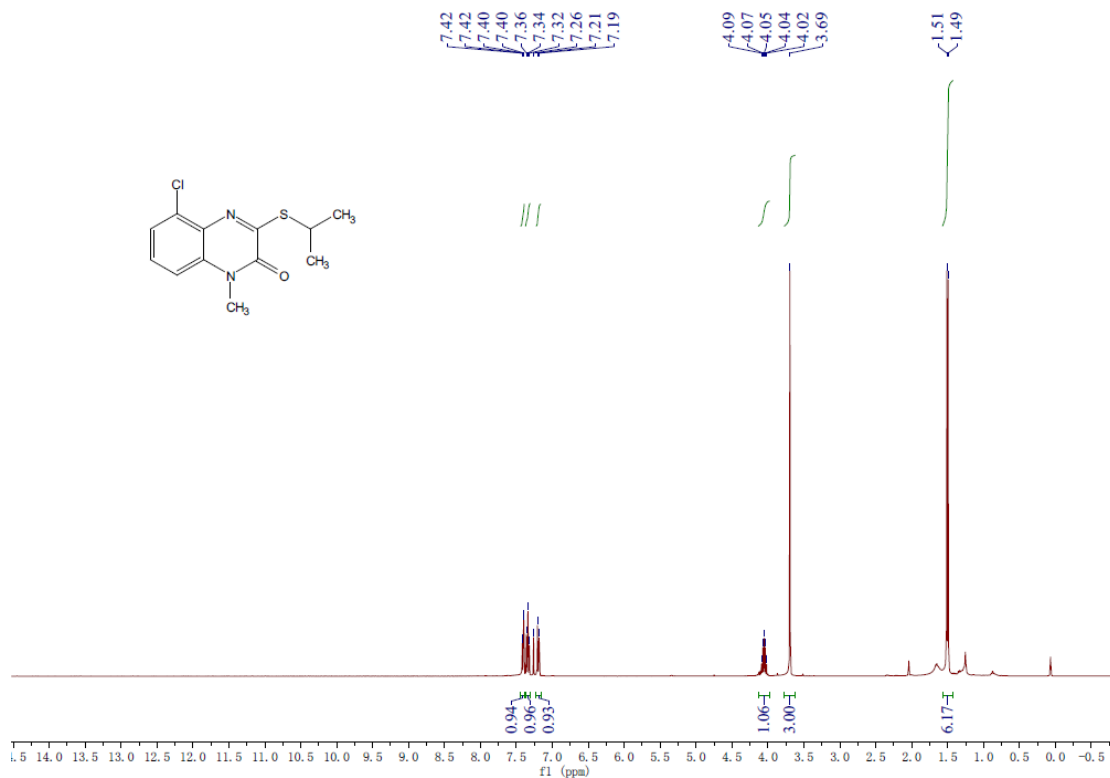

**<sup>1</sup>H spectra of 3ja**

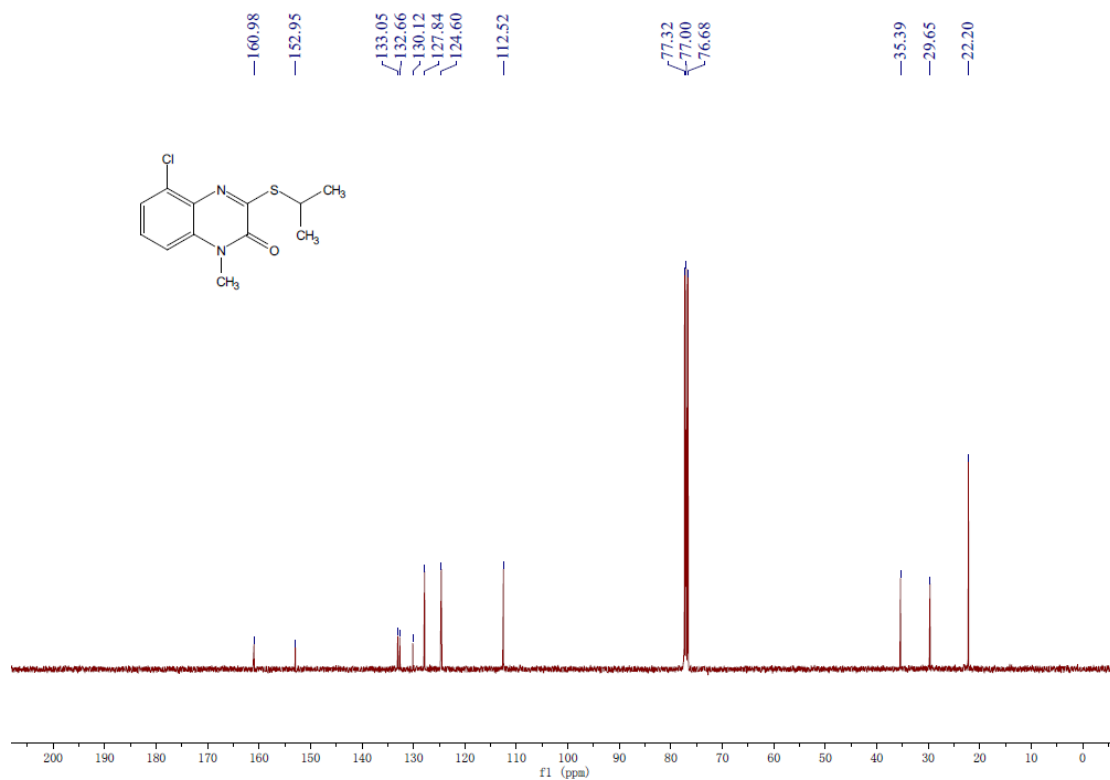

**<sup>13</sup>C spectra of 3ja**

**6-fluoro-3-(isopropylthio)-1-methylquinoxalin-2(1H)-one (3ka)**

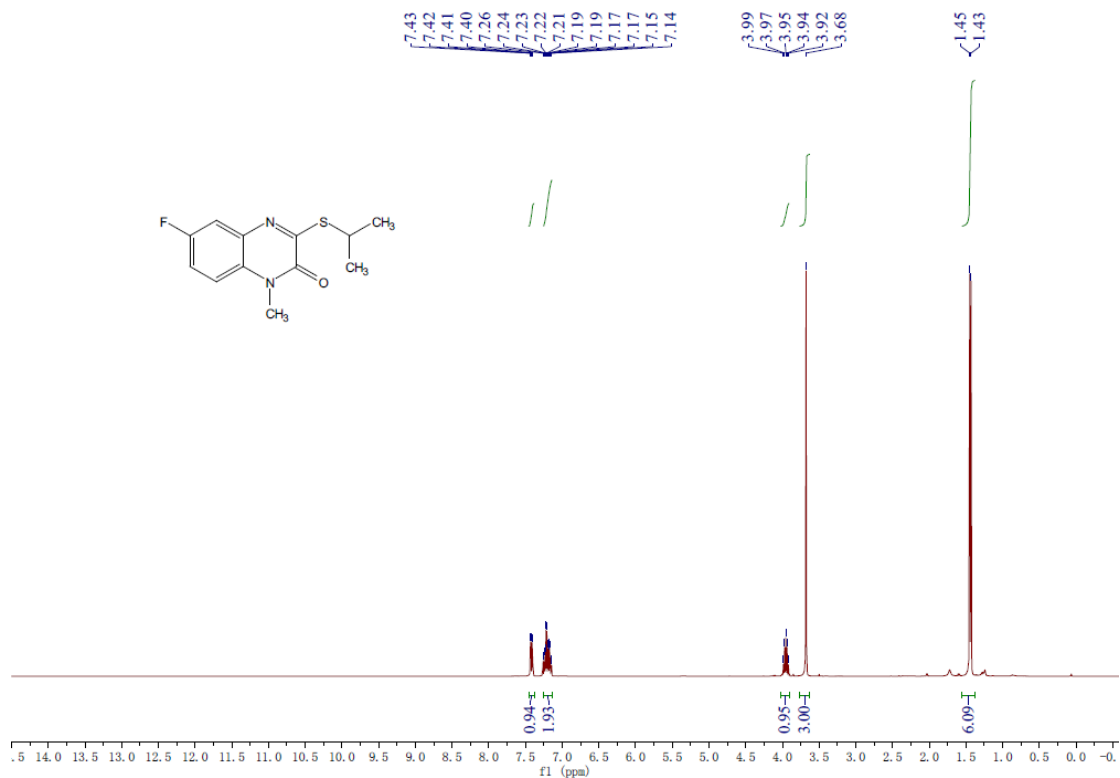

**<sup>1</sup>H spectra of 3ka**

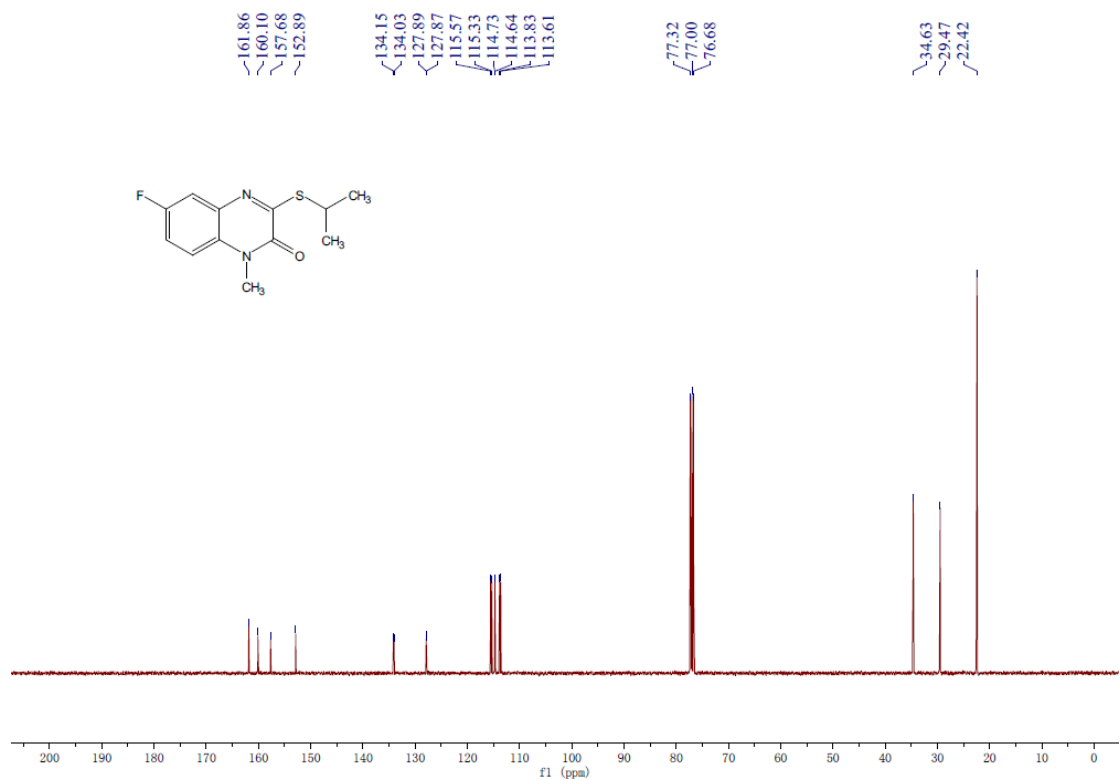

**<sup>13</sup>C spectra of 3ka**

**6-chloro-3-(isopropylthio)-1-methylquinolin-2(1H)-one (3la)**

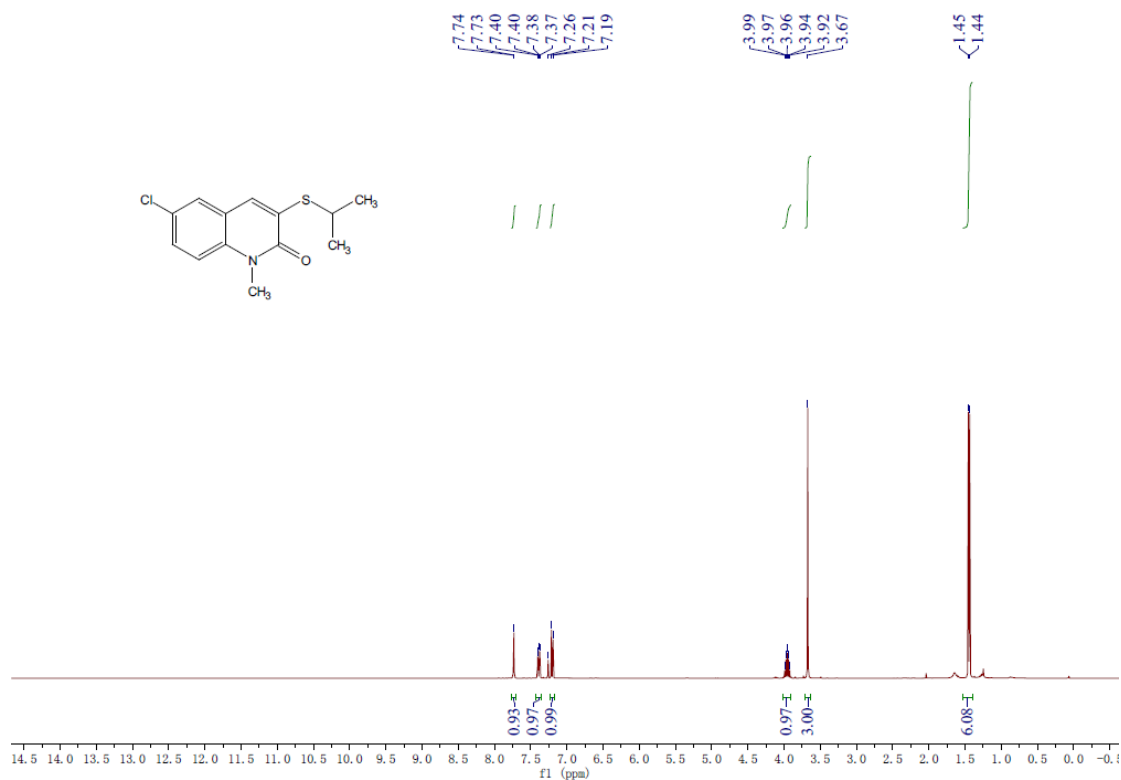

**<sup>1</sup>H spectra of 3la**

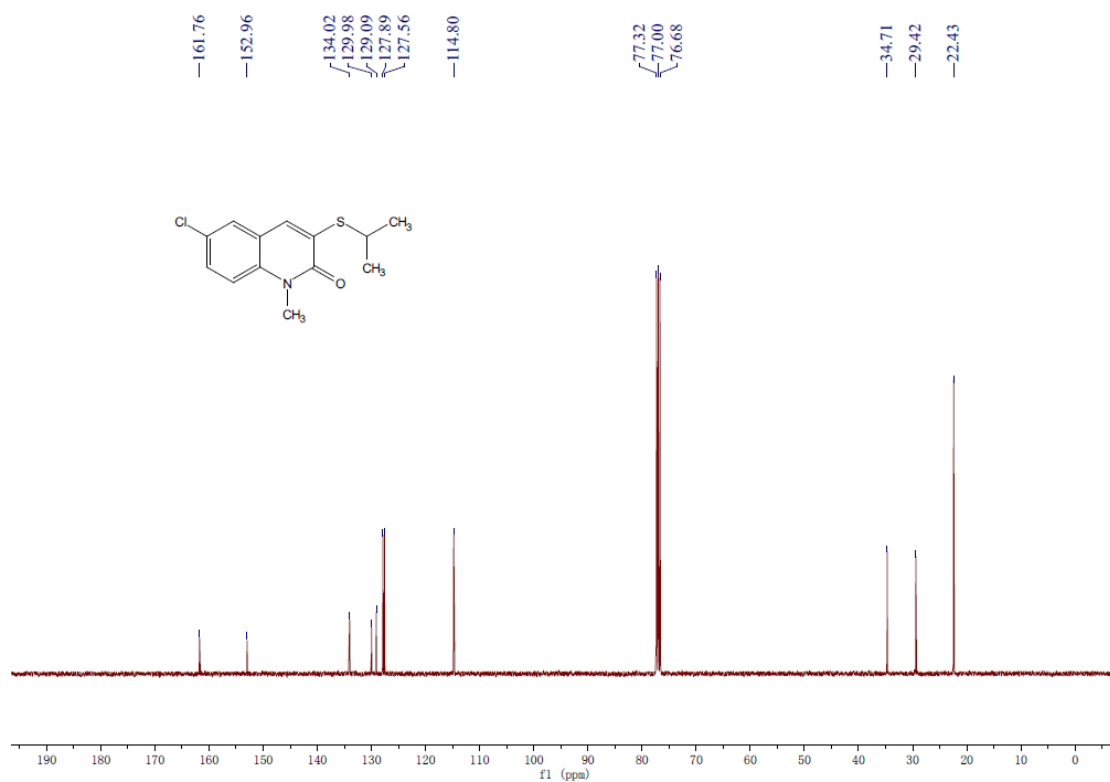

**<sup>13</sup>C spectra of 3la**

**6-bromo-3-(isopropylthio)-1-methylquinolin-2(1H)-one (3ma)**

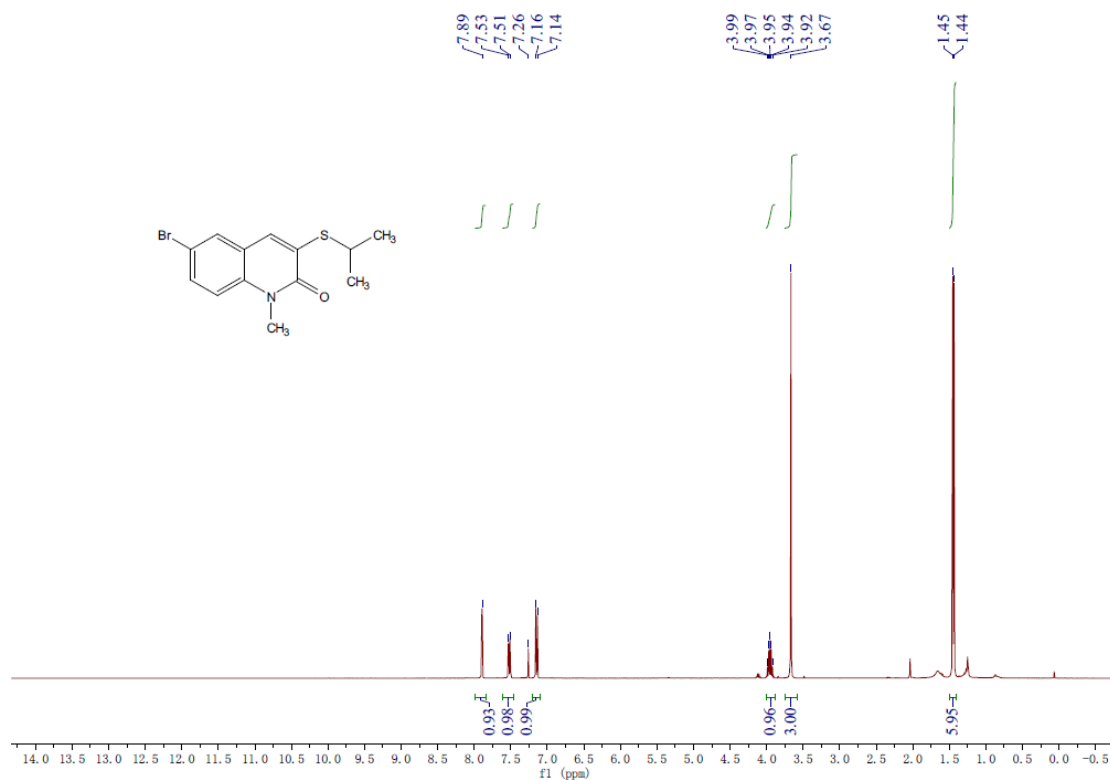

**<sup>1</sup>H spectra of 3ma**

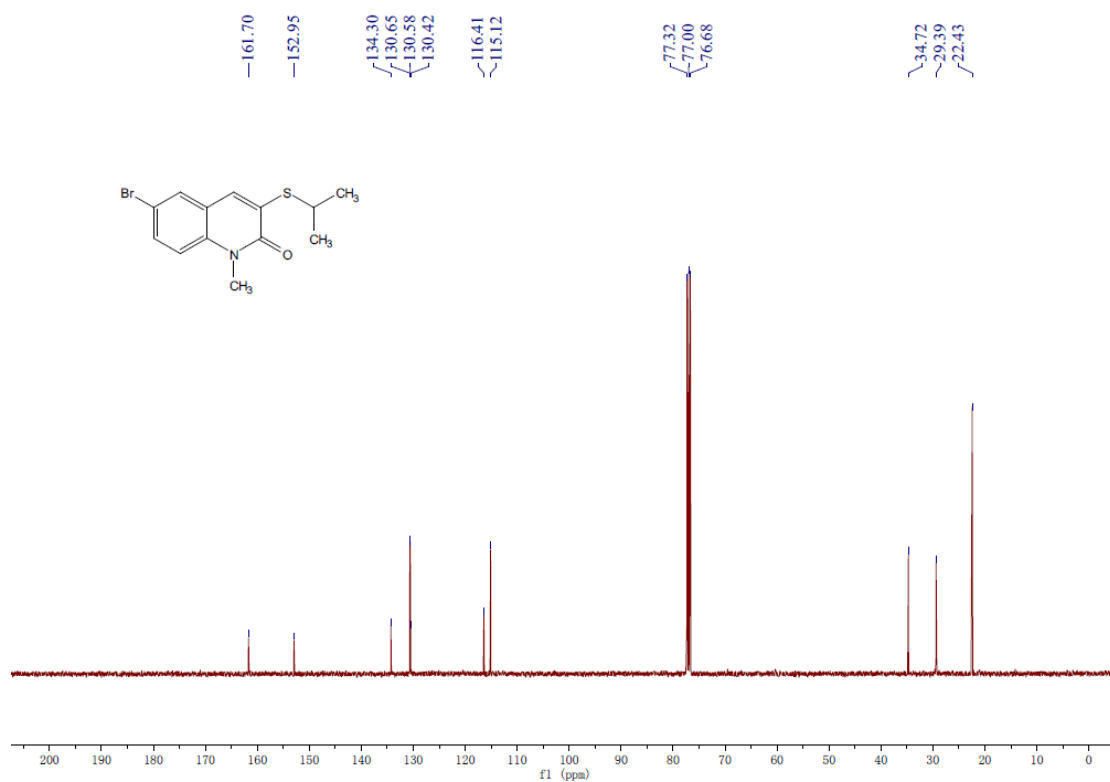

**<sup>13</sup>C spectra of 3ma**

**3-(isopropylthio)-1-methyl-6-(trifluoromethyl)quinolin-2(1H)-one (3na)**

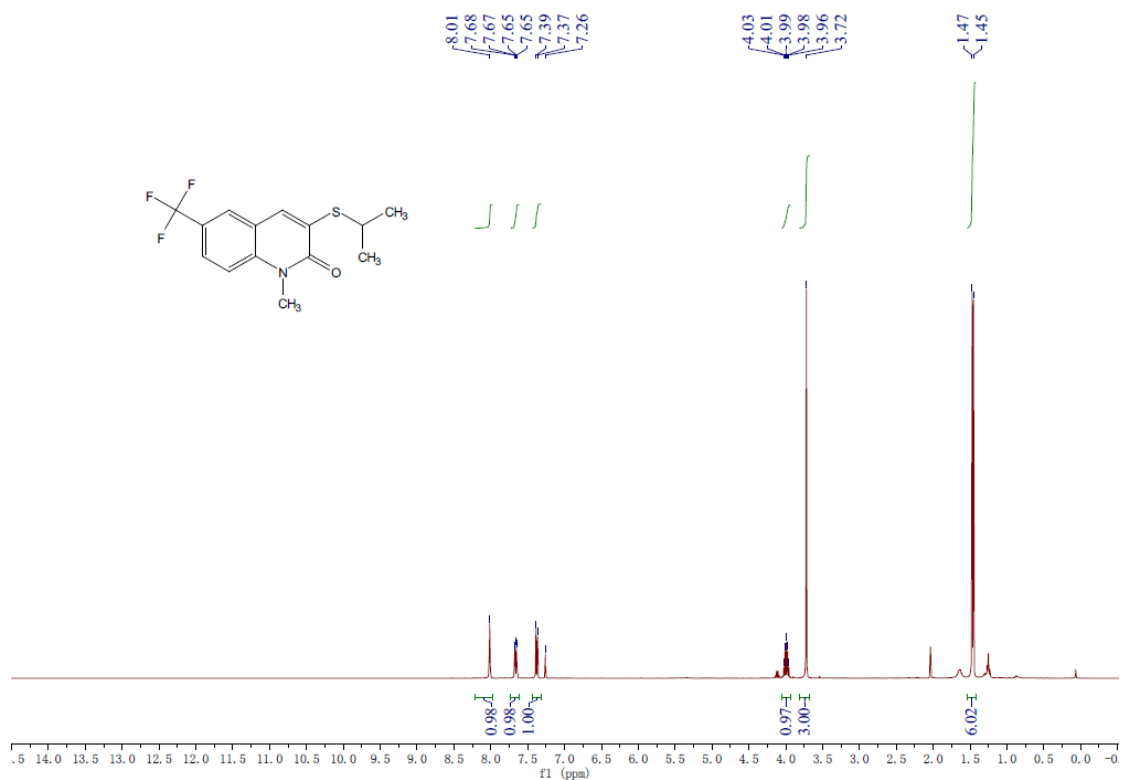

**<sup>1</sup>H spectra of 3na**

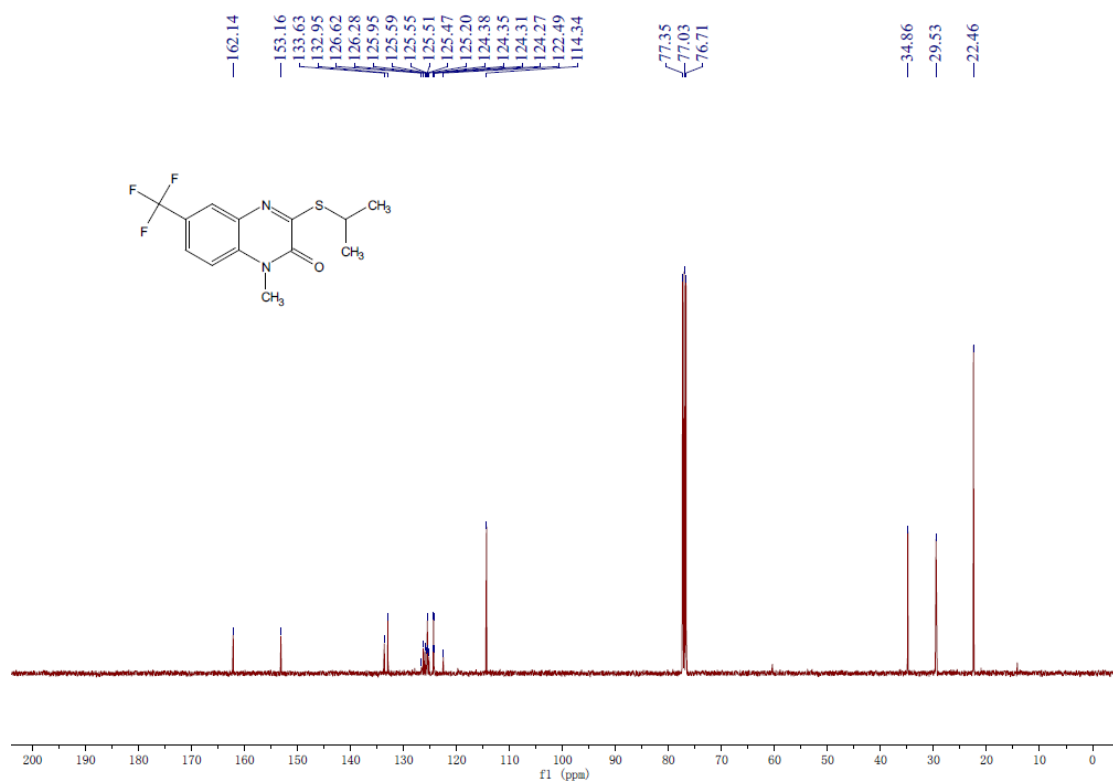

**<sup>13</sup>C spectra of 3na**

**6-benzoyl-3-(isopropylthio)-1-methylquinoxalin-2(1H)-one (3oa)**

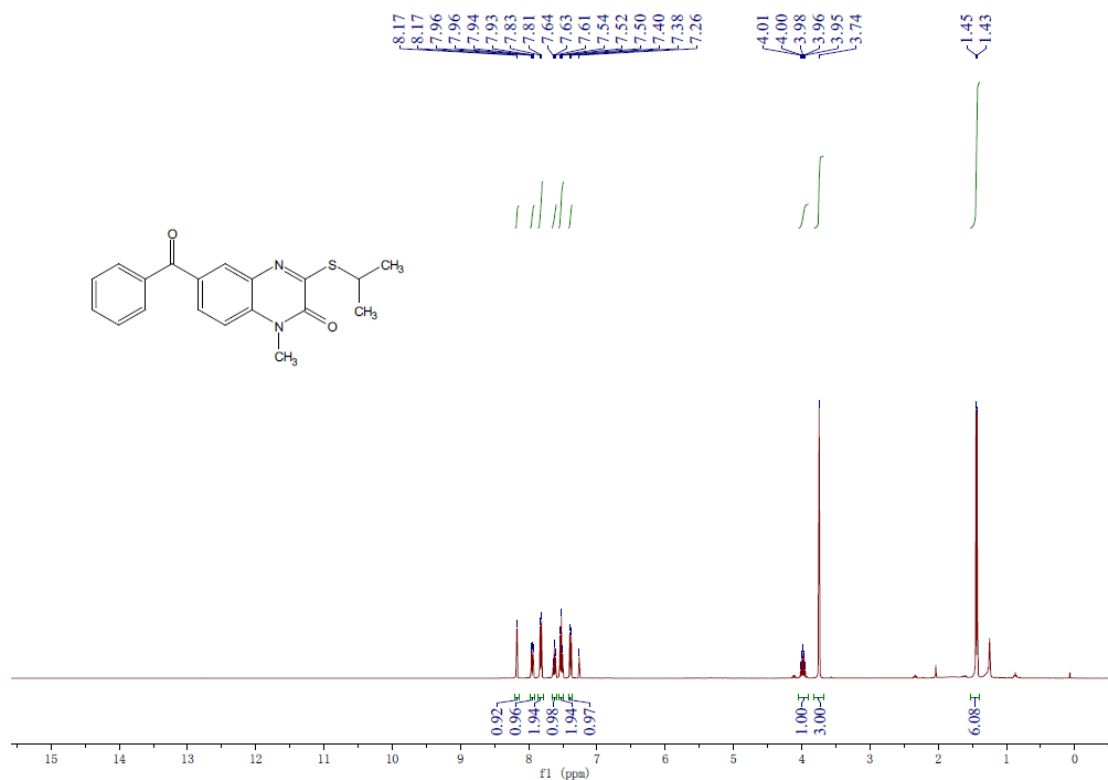

<sup>1</sup>H spectra of **3oa**

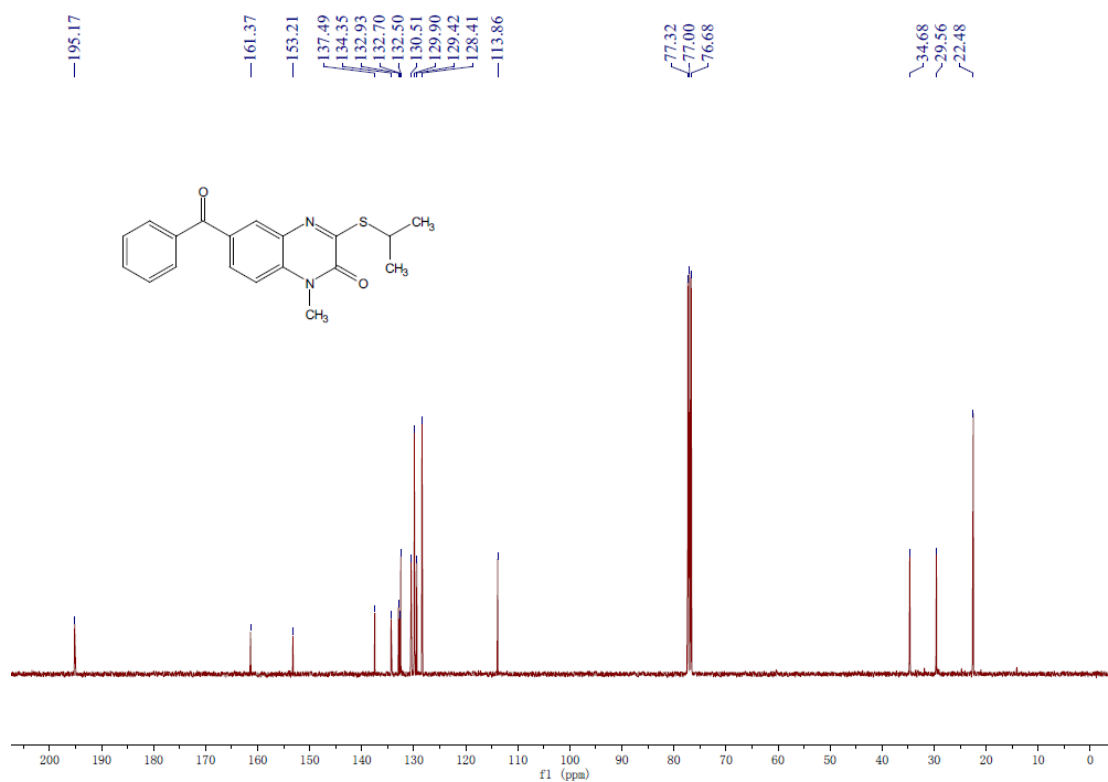

<sup>13</sup>C spectra of **3oa**



**7-fluoro-3-(isopropylthio)-1-methylquinolin-2(1H)-one (3pa)**

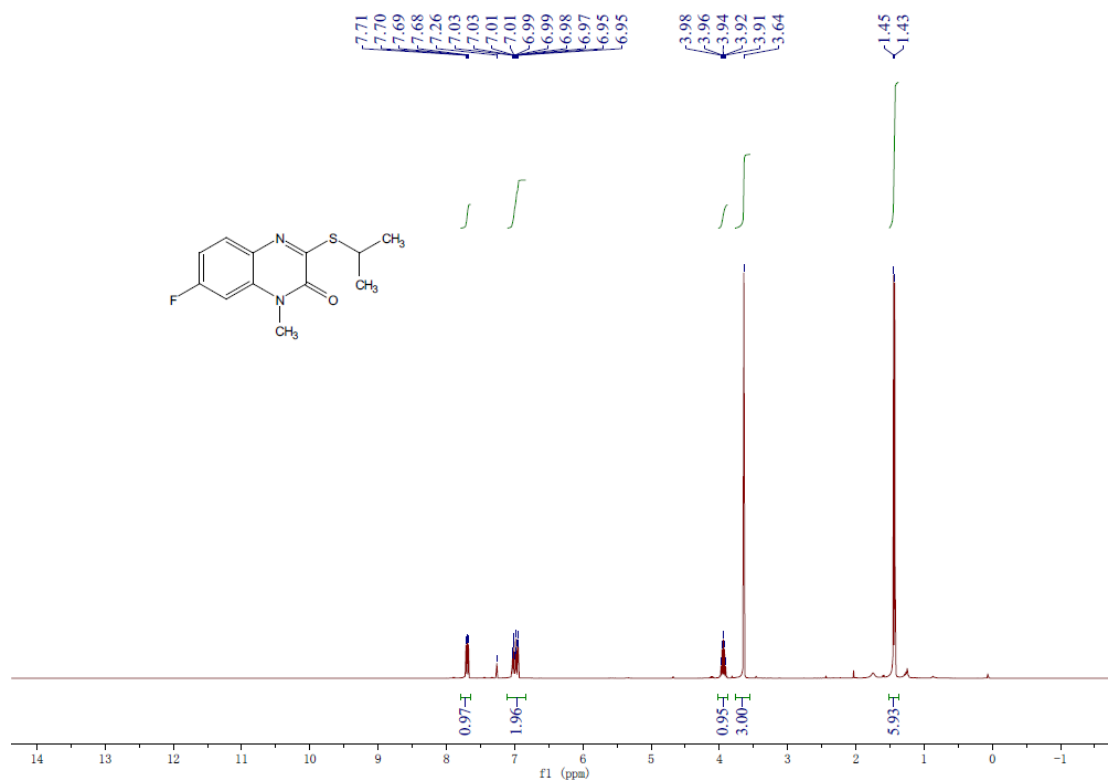

**<sup>1</sup>H spectra of 3pa**

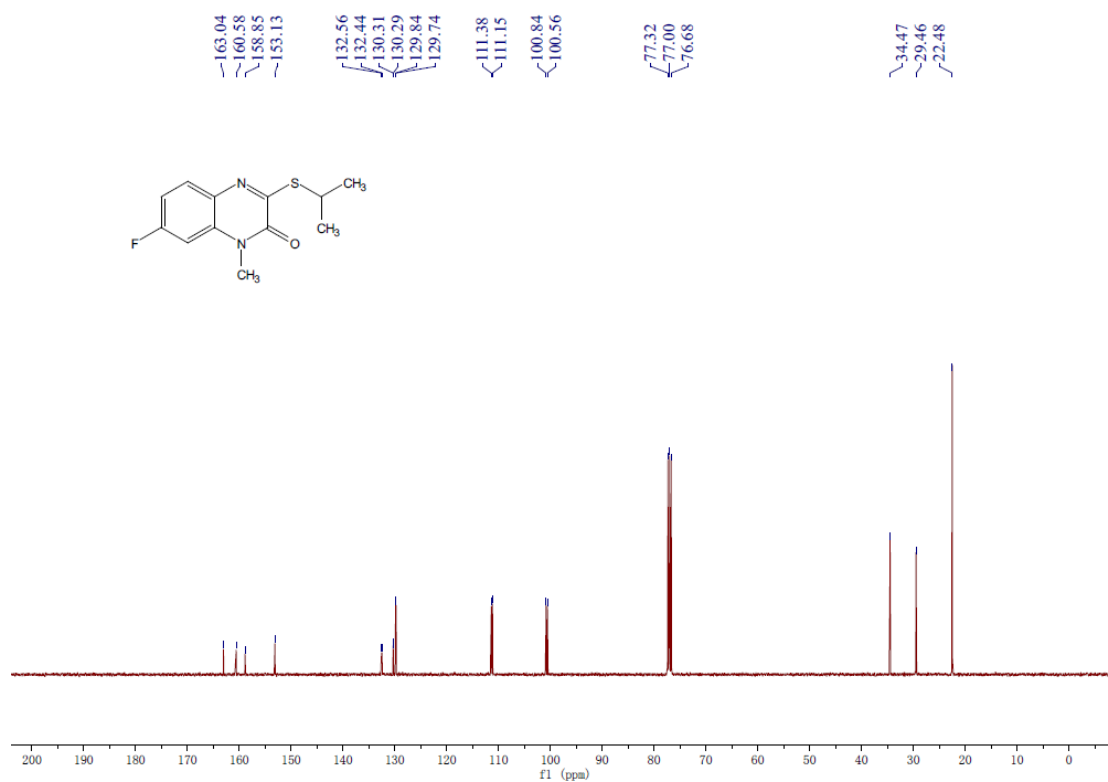

**<sup>13</sup>C spectra of 3pa**

**3-(isopropylthio)-1-methyl-7-(trifluoromethyl)quinolin-2(1H)-one (3qa)**

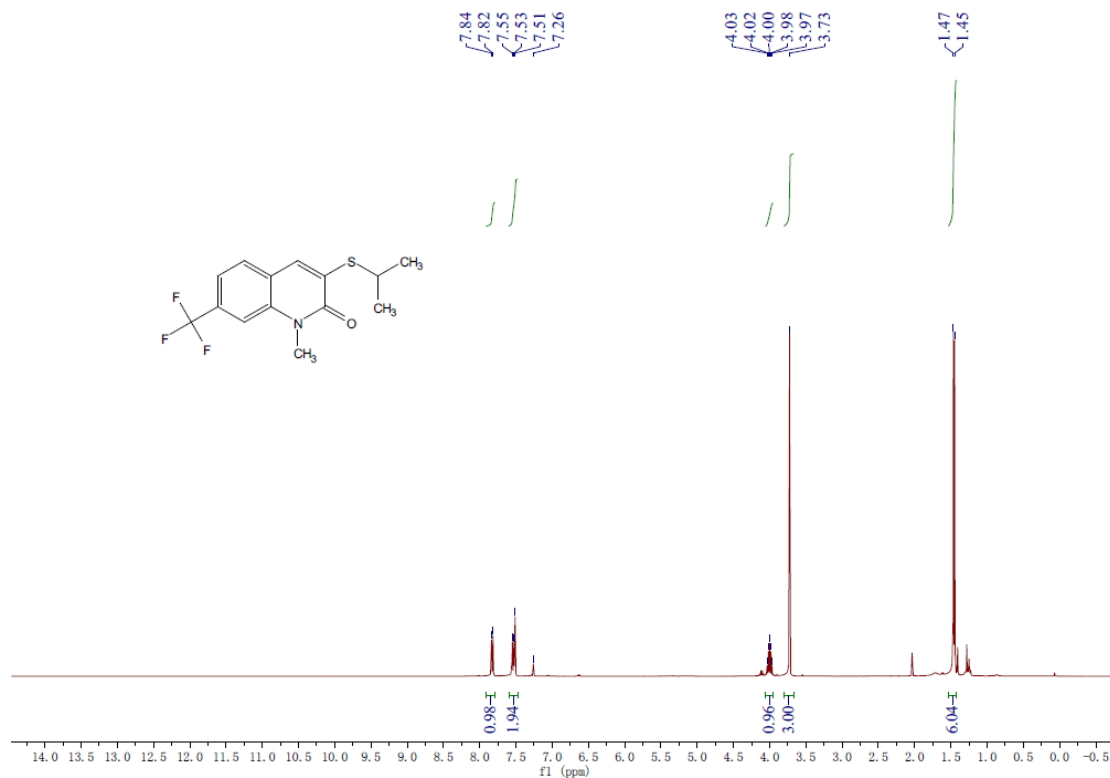

**<sup>1</sup>H spectra of 3qa**

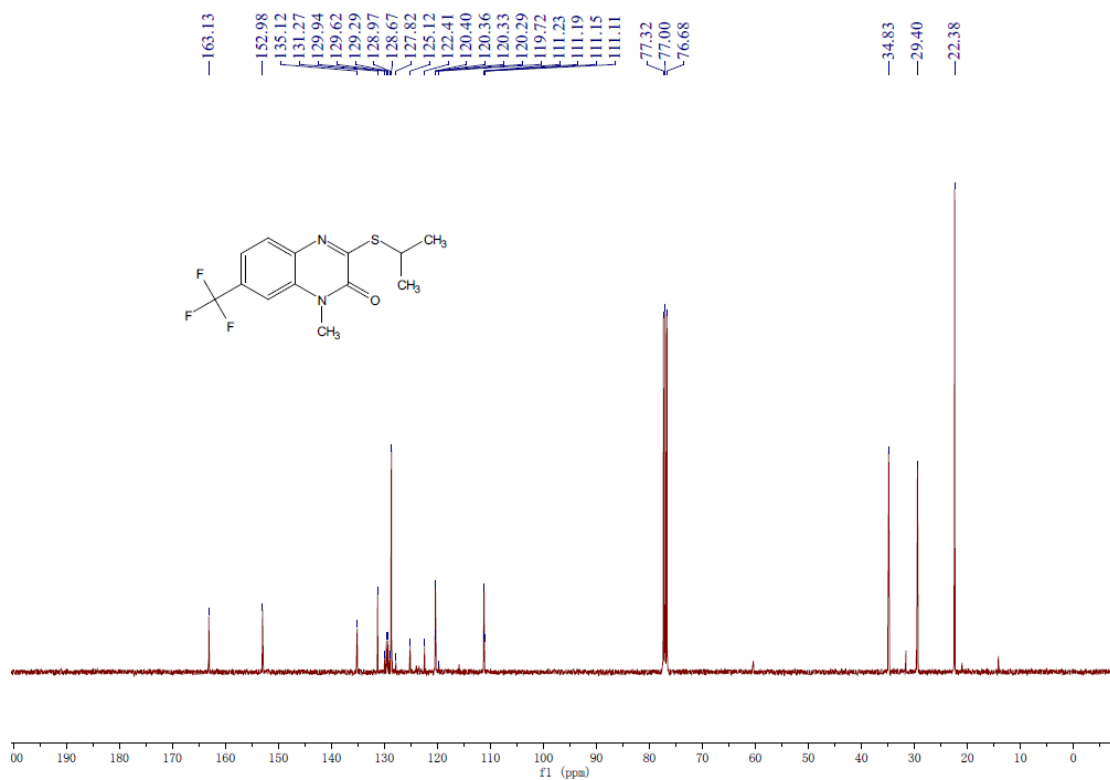

**<sup>13</sup>C spectra of 3qa**

**methyl 2-(isopropylthio)-4-methyl-3-oxo-3,4-dihydroquinoxaline-6-carboxylate (3ra)**

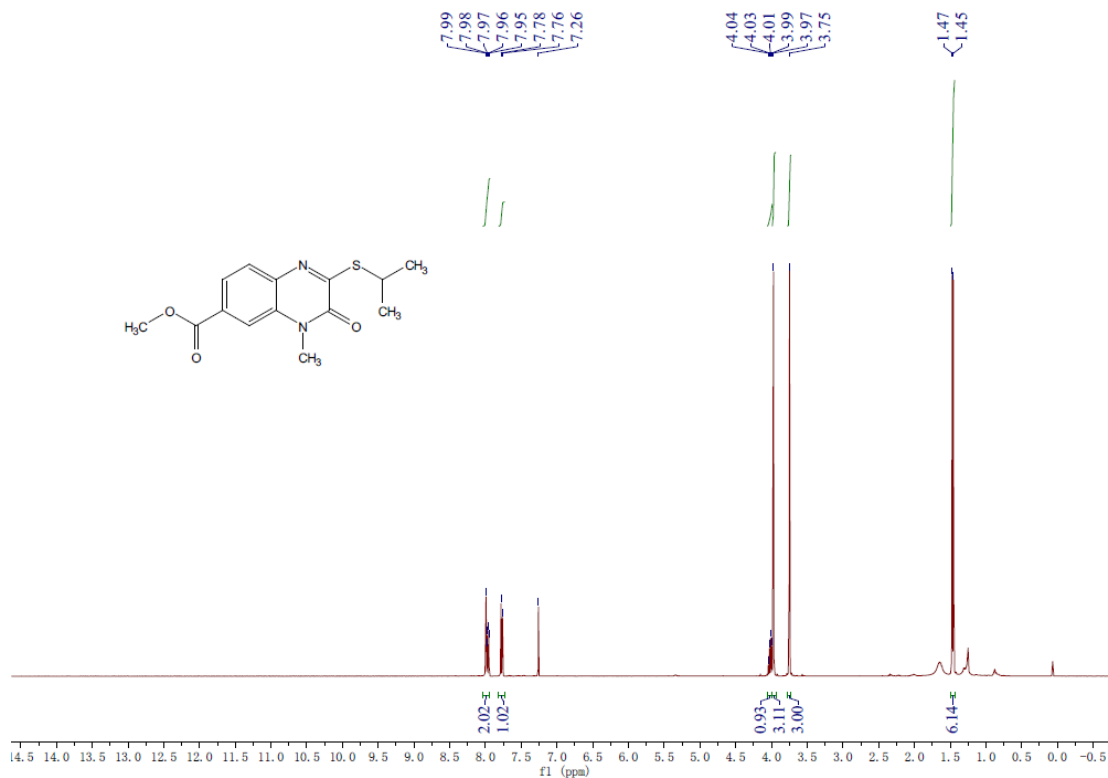

<sup>1</sup>H spectra of **3ra**

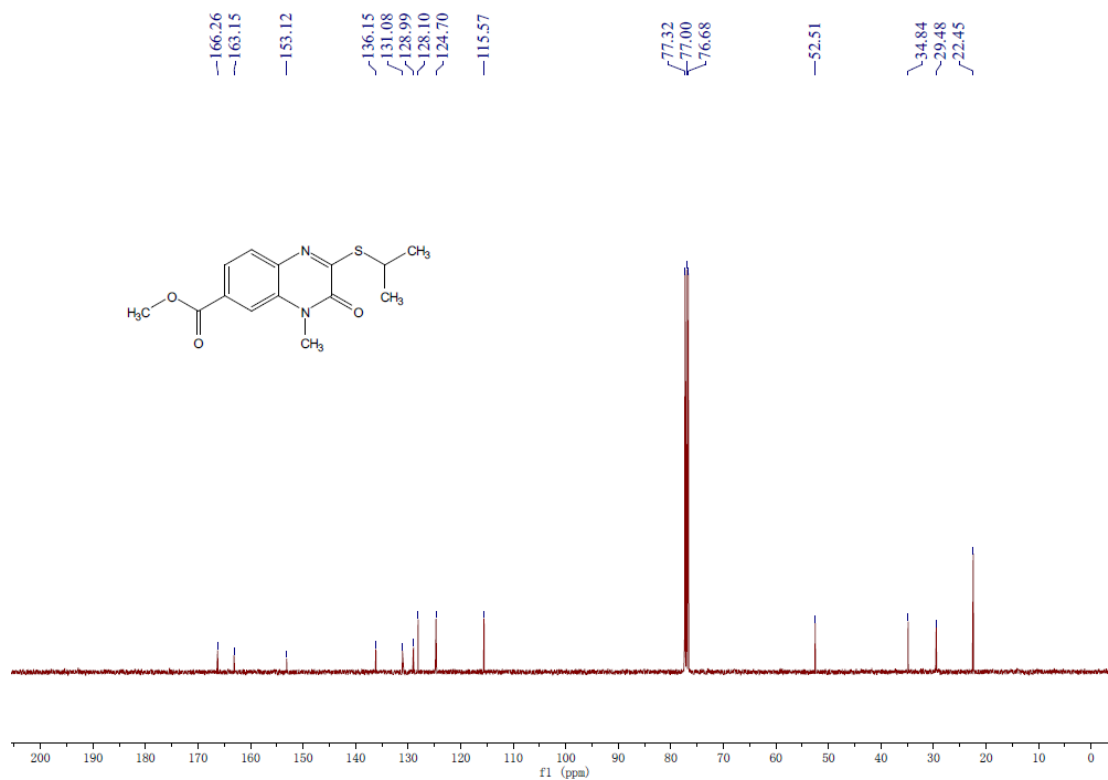

<sup>13</sup>C spectra of **3ra**

### 3-(isopropylthio)quinoxalin-2(1H)-one (3sa)

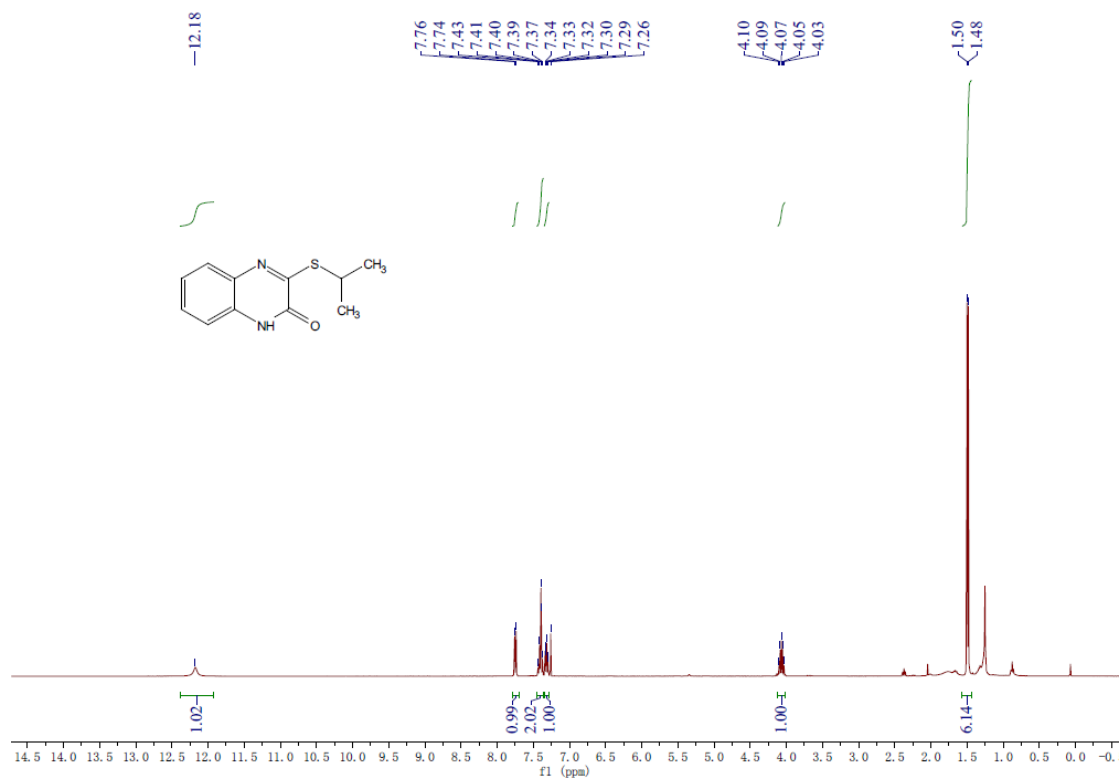

<sup>1</sup>H spectra of 3sa

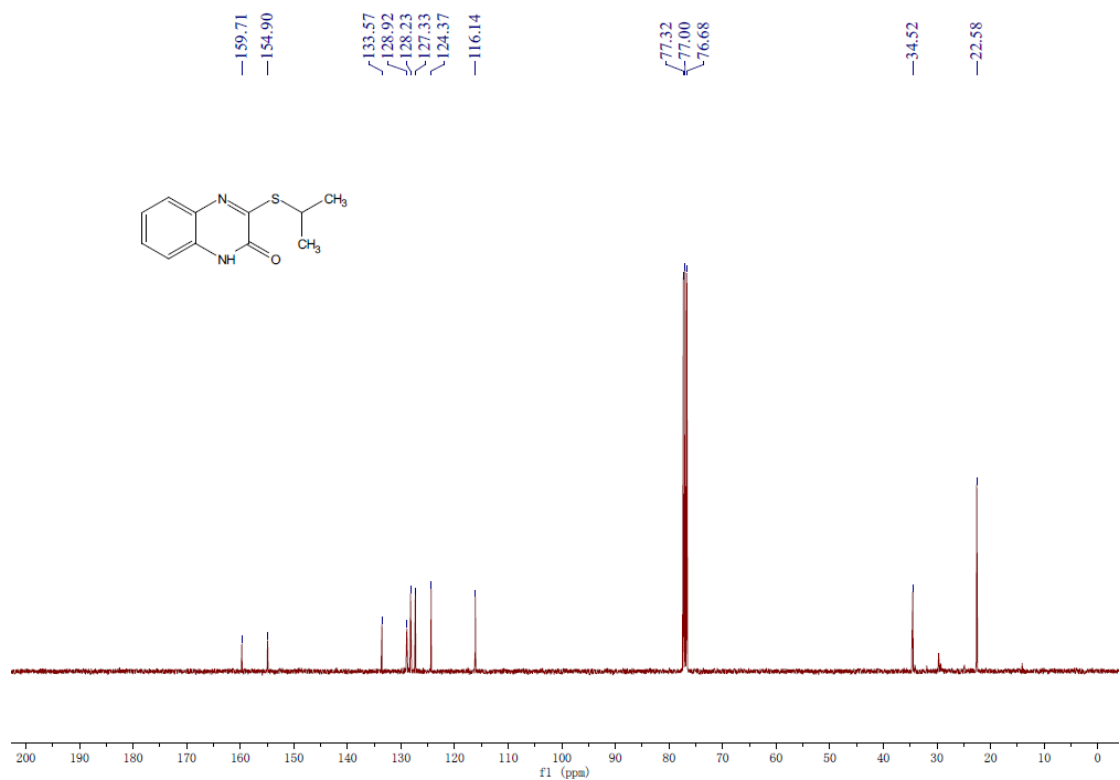

<sup>13</sup>C spectra of 3sa

**3-(isopropylthio)-1-methylbenzo[g]quinoxalin-2(1H)-one (3ta)**

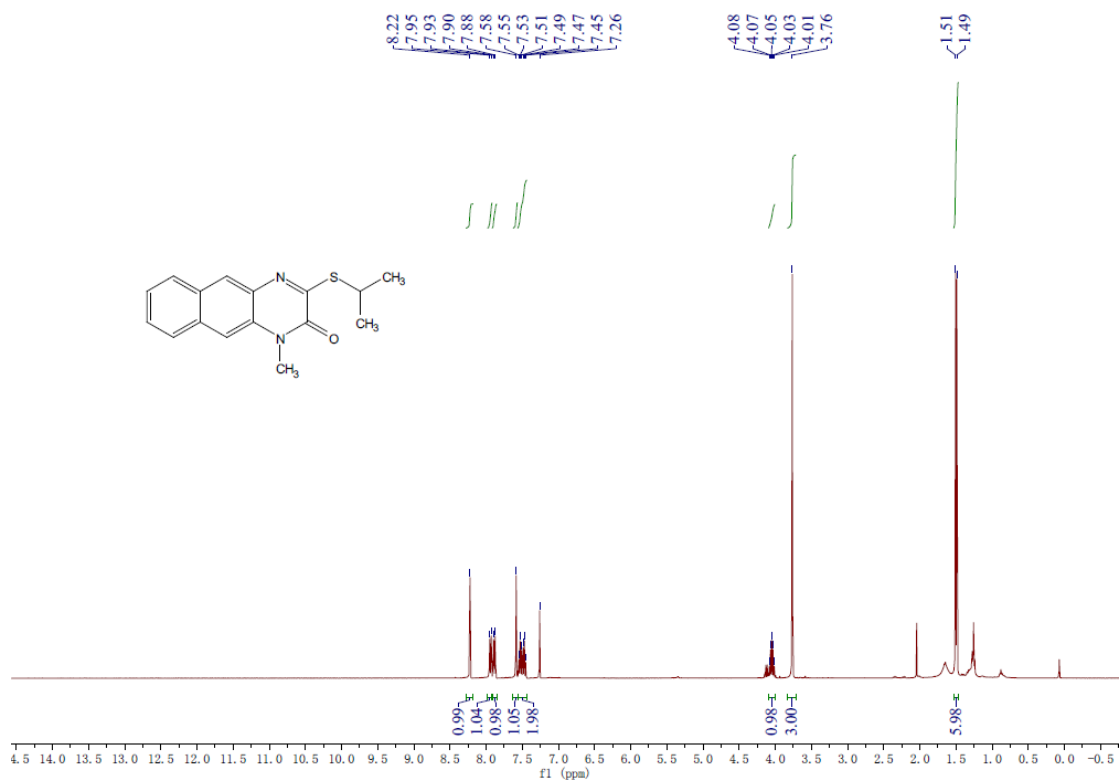

**<sup>1</sup>H spectra of 3ta**

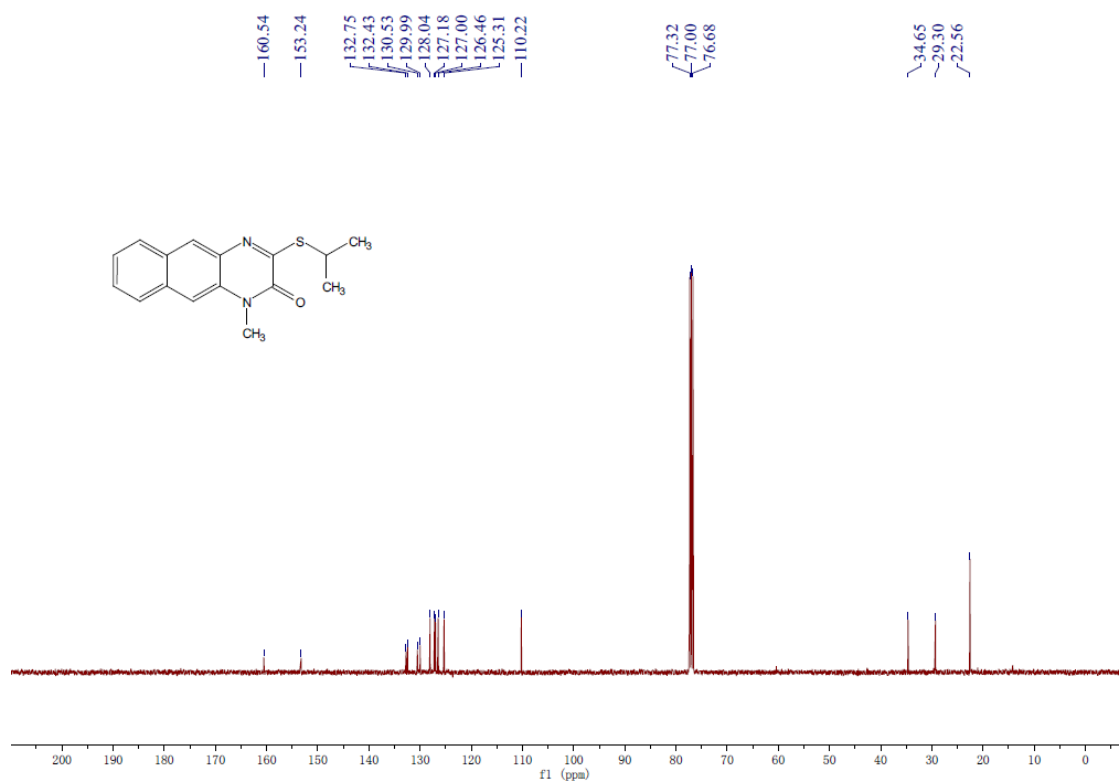

**<sup>13</sup>C spectra of 3ta**

**3-(butylthio)-1-methylquinoxalin-2(1H)-one (3ab)**

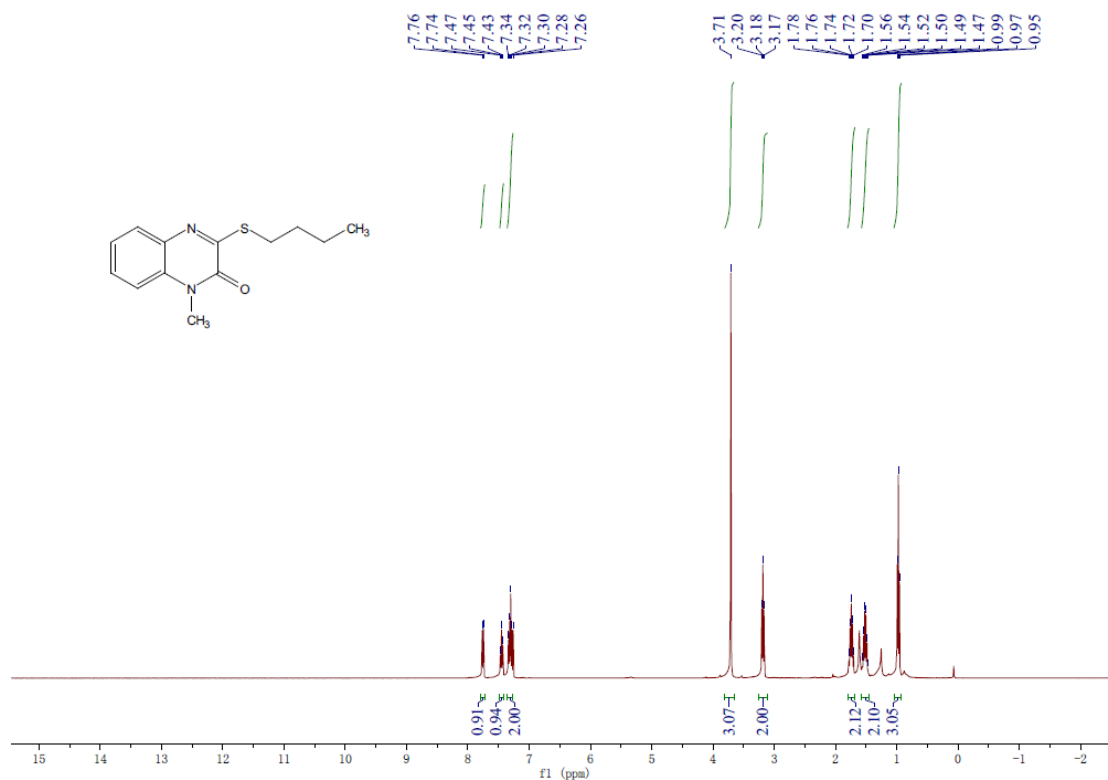

<sup>1</sup>H spectra of **3ab**

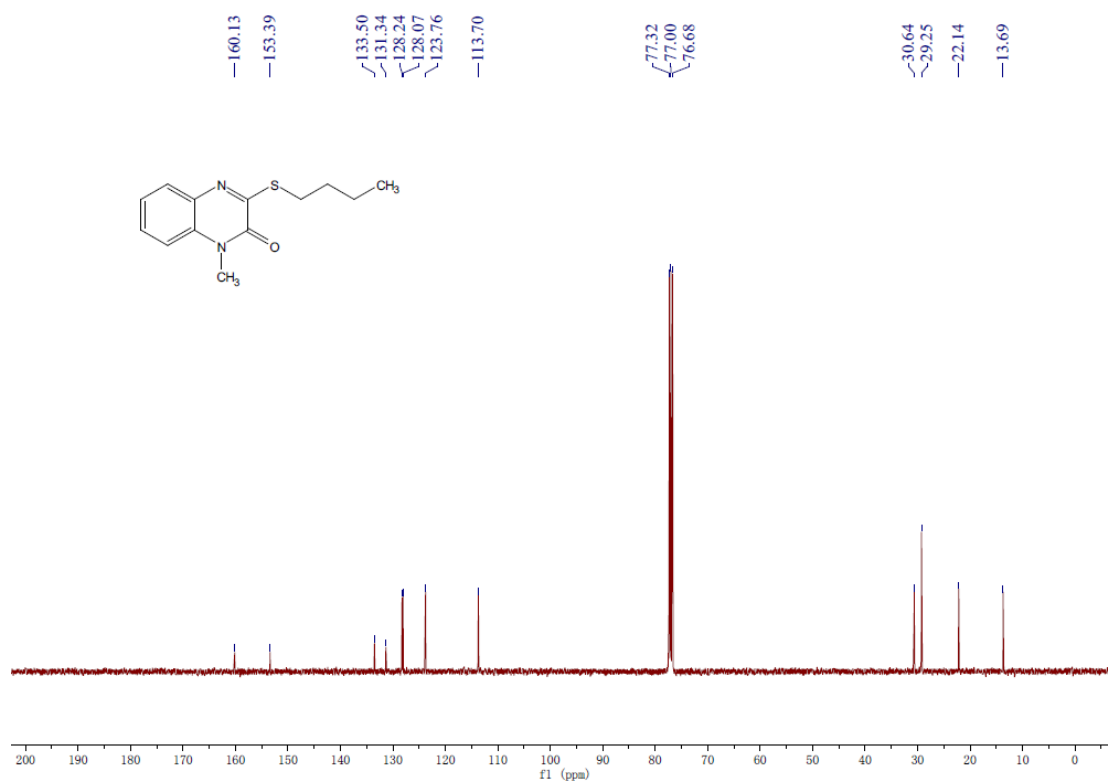

<sup>13</sup>C spectra of **3ab**

**1-methyl-3-(octylthio)quinoxalin-2(1H)-one (3ac)**

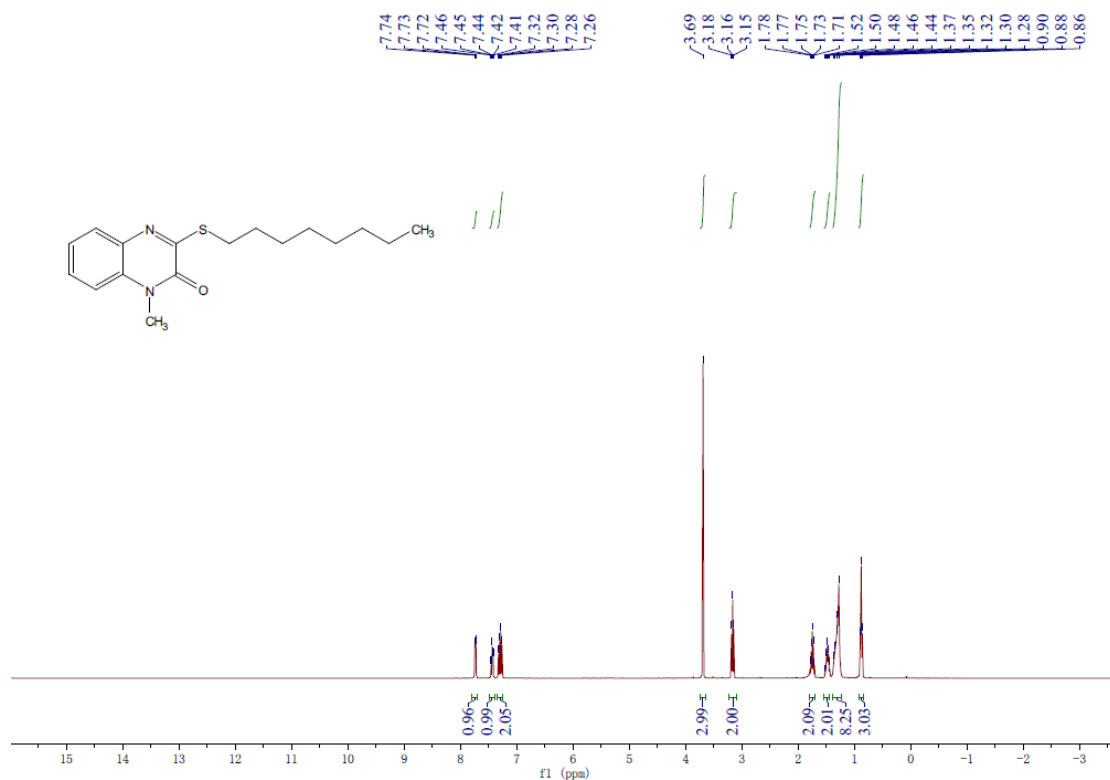

<sup>1</sup>H spectra of **3ac**

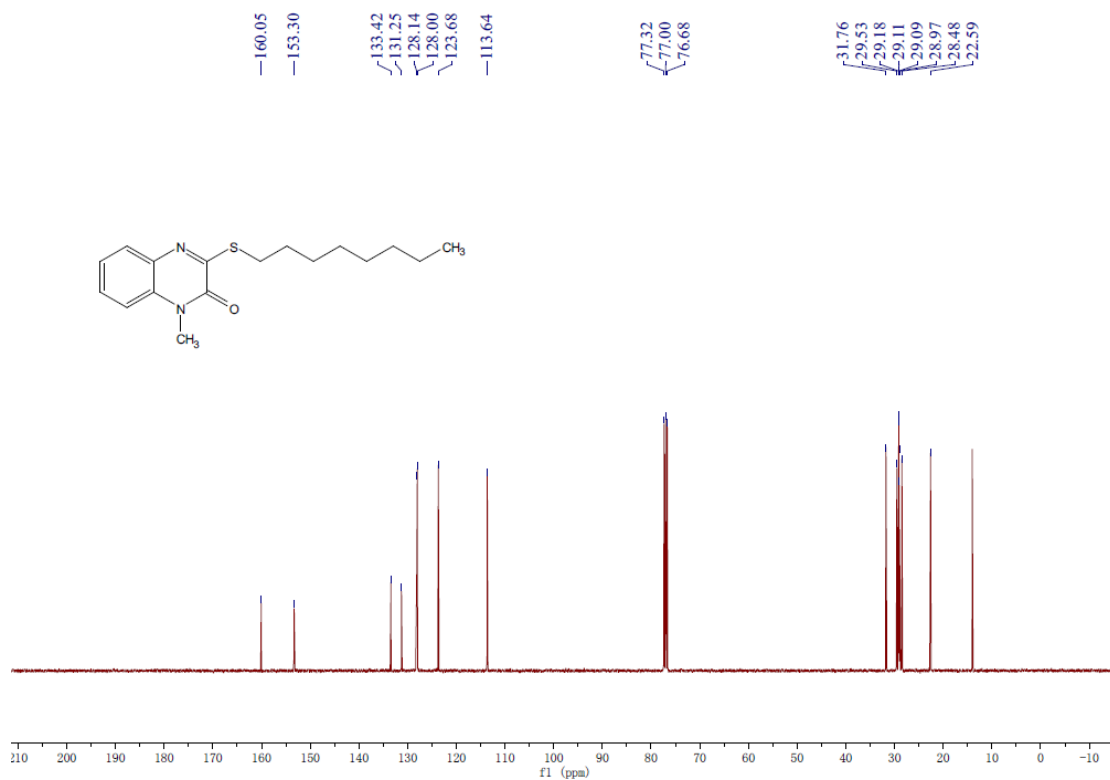

<sup>13</sup>C spectra of **3ac**

**3-(isobutylthio)-1-methylquinoxalin-2(1H)-one (3ad)**

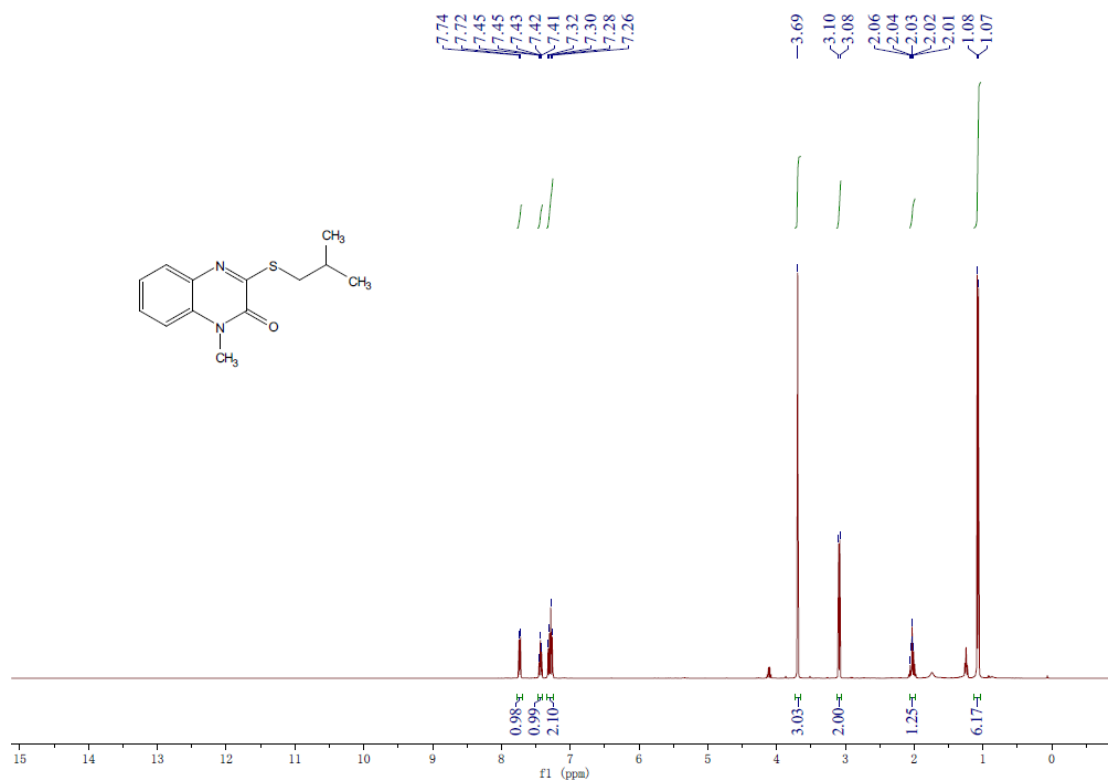

<sup>1</sup>H spectra of 3ad

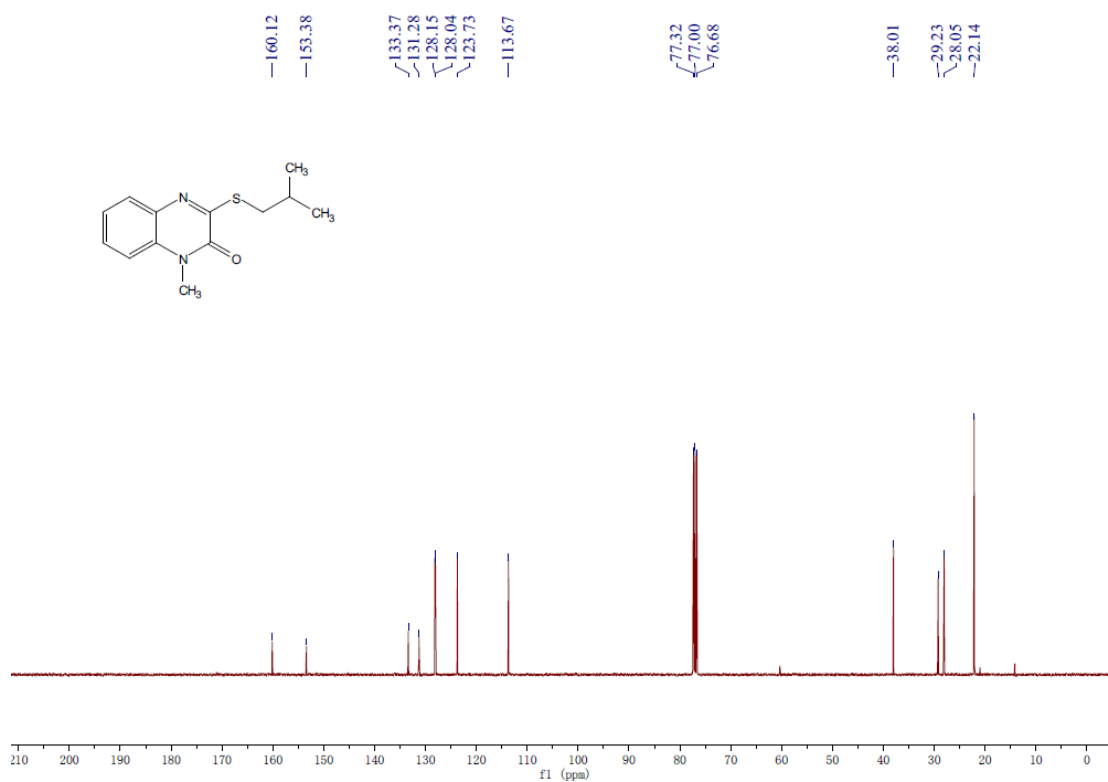

<sup>13</sup>C spectra of 3ad



**3-(tert-butylthio)-1-methylquinoxalin-2(1H)-one (3ae)**

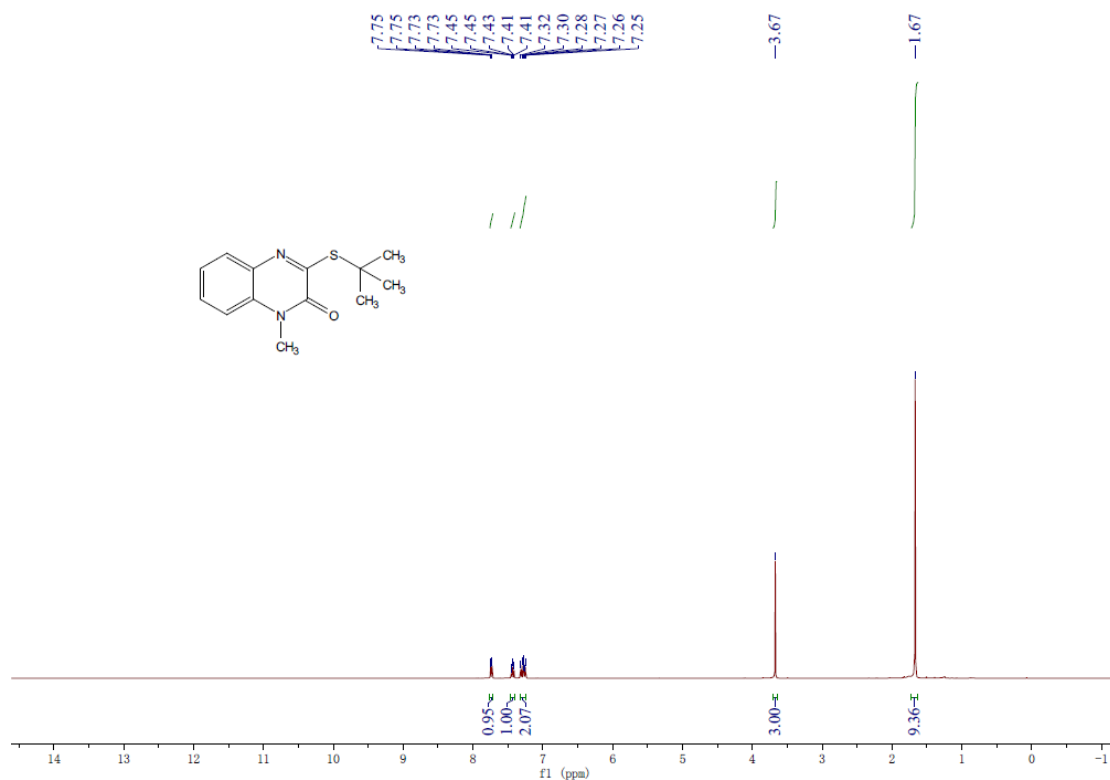

<sup>1</sup>H spectra of 3ae

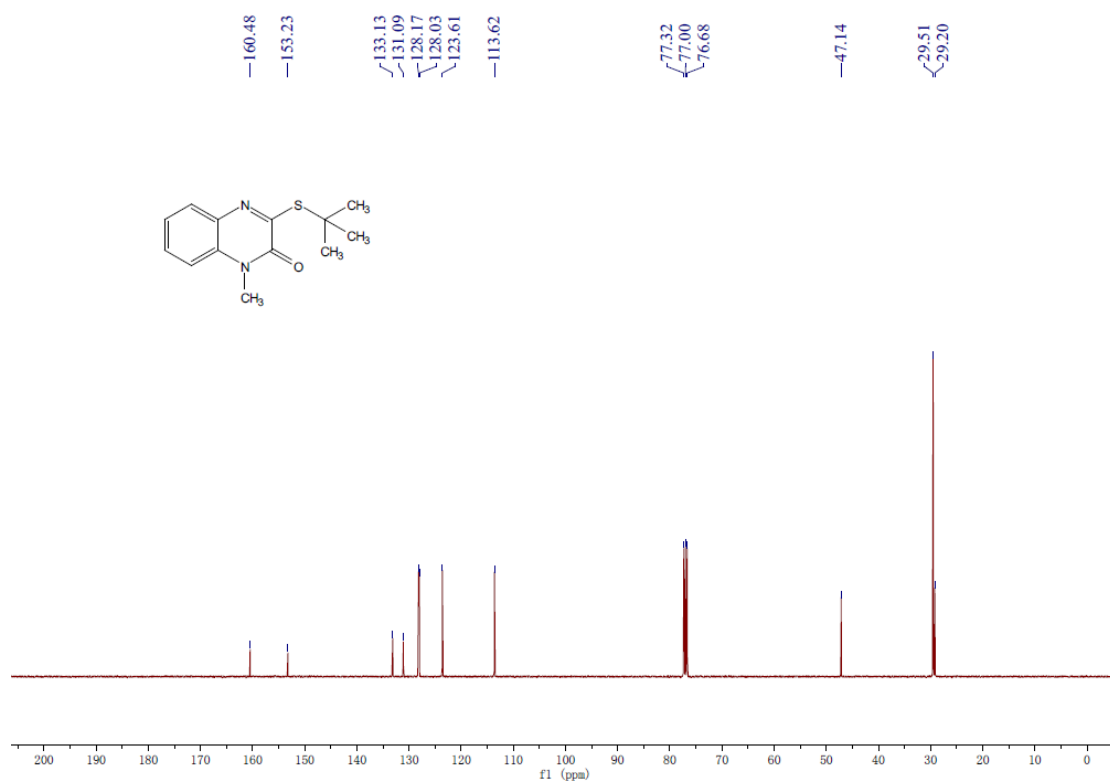

<sup>13</sup>C spectra of 3ae

**1-methyl-3-((3-methylbutan-2-yl)thio)quinoxalin-2(1H)-one (3af)**

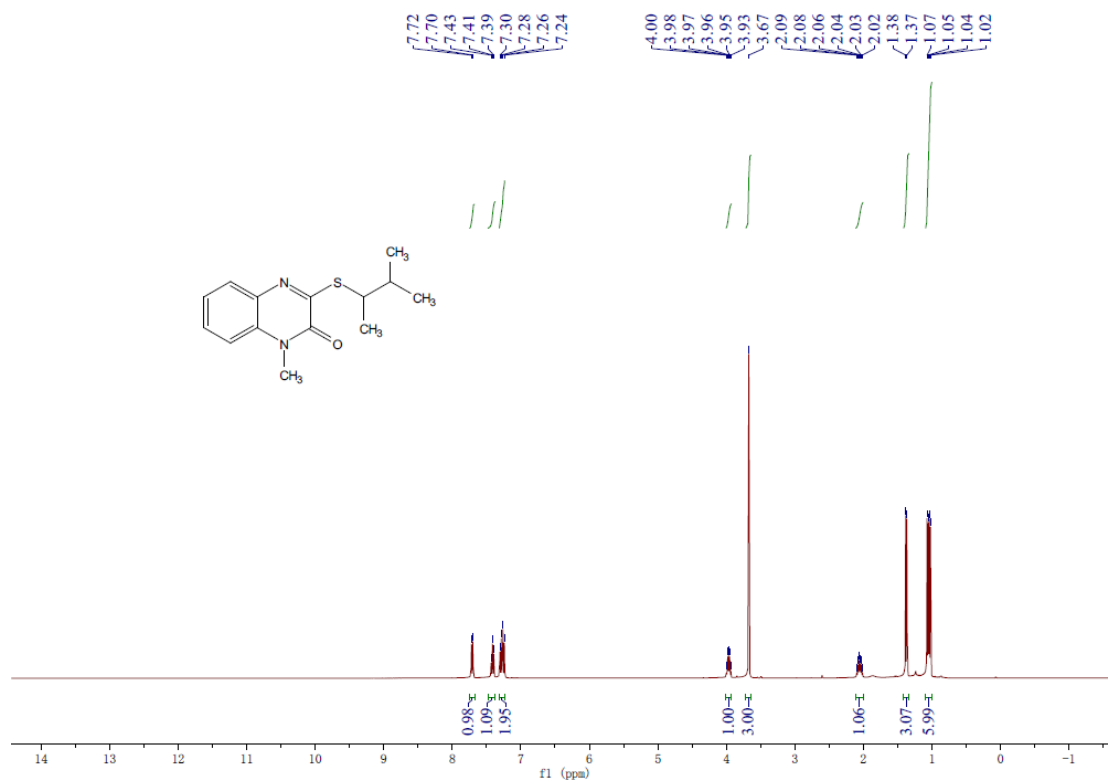

<sup>1</sup>H spectra of **3af**

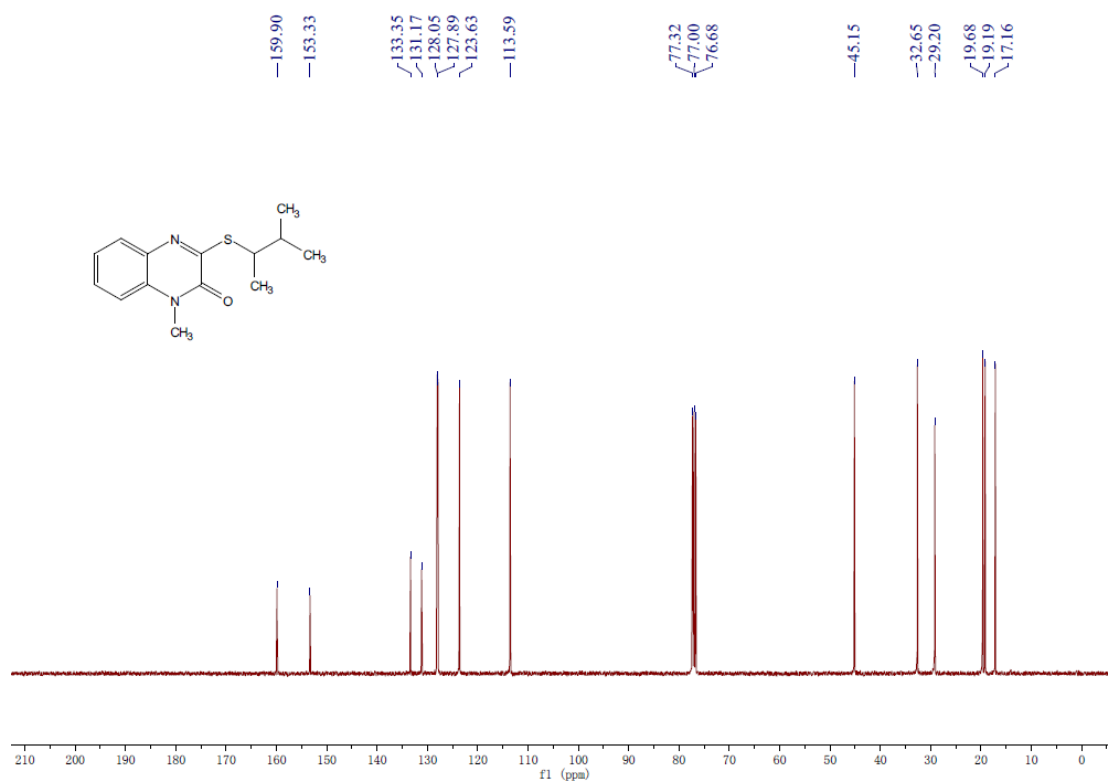

<sup>13</sup>C spectra of **3af**

**3-(benzylthio)-1-methylquinoxalin-2(1H)-one (3ag)**

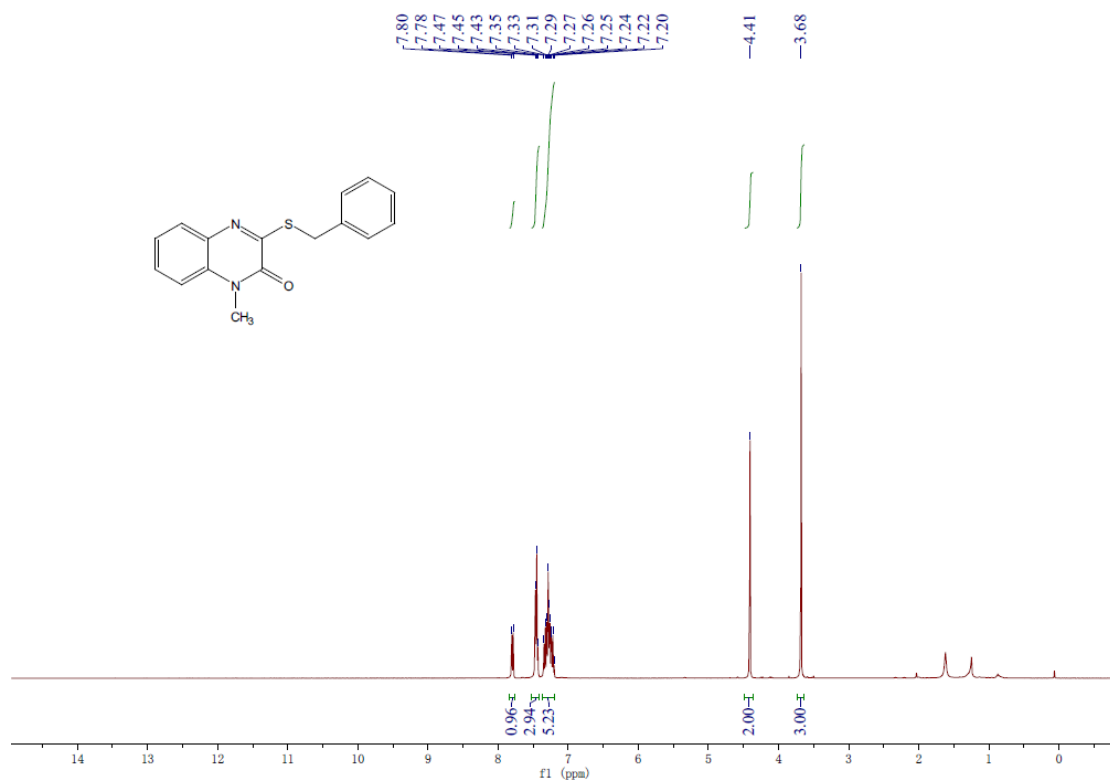

<sup>1</sup>H spectra of **3ag**

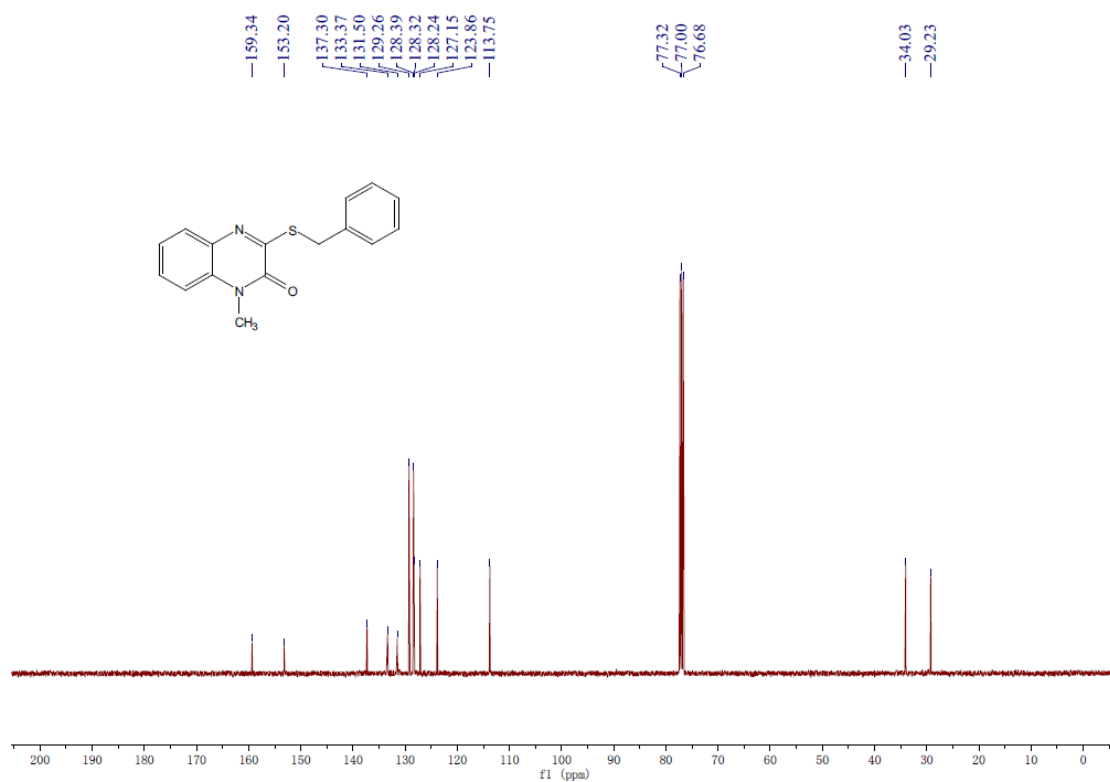

<sup>13</sup>C spectra of **3ag**

**3-((4-chlorobenzyl)thio)-1-methylquinoxalin-2(1H)-one (3ah)**

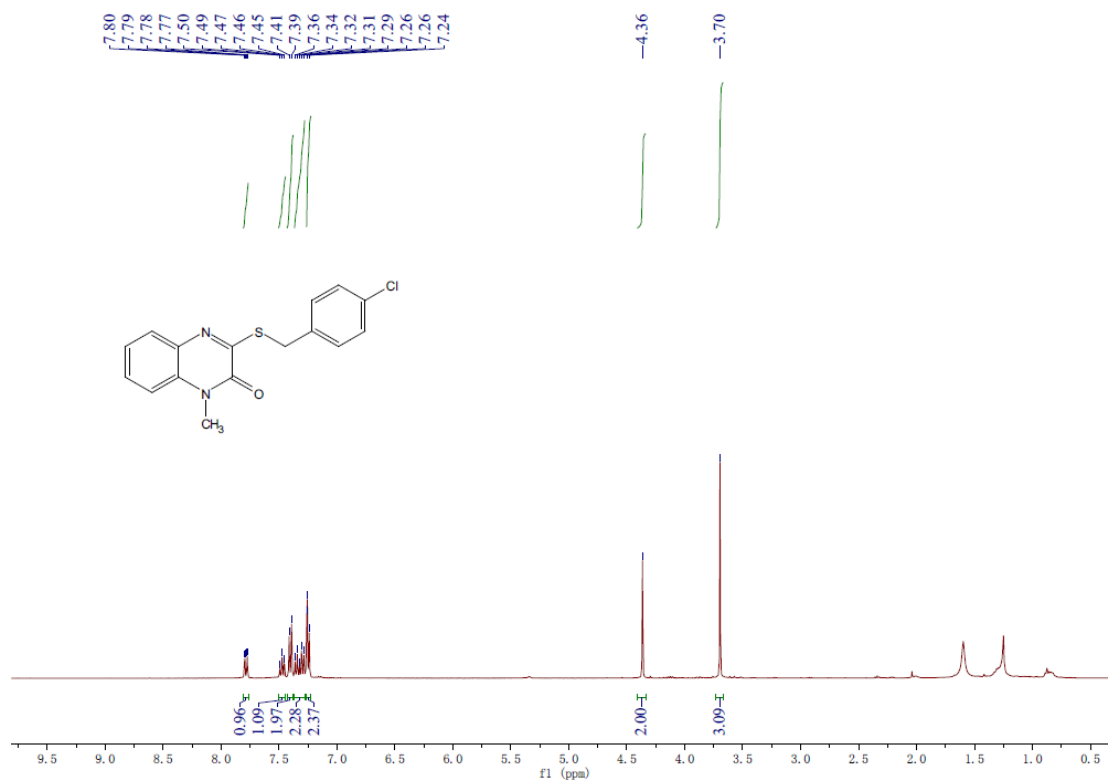

**<sup>1</sup>H spectra of 3ah**

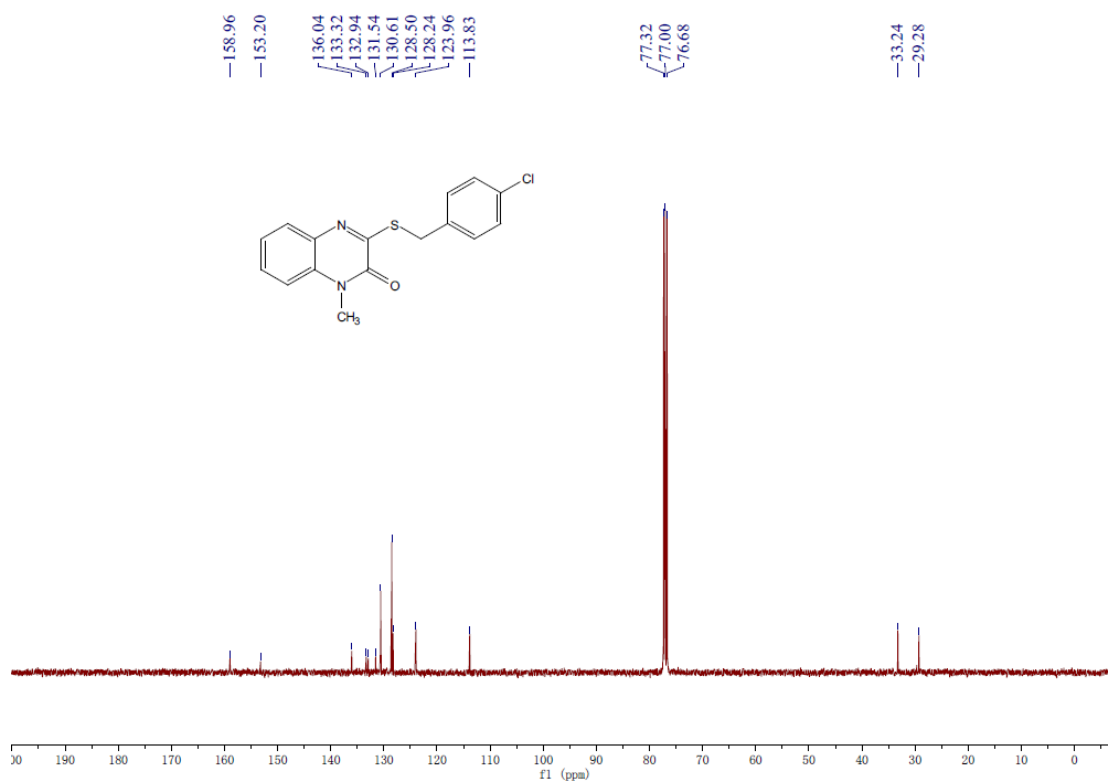

**<sup>13</sup>C spectra of 3ah**

**3-((furan-2-ylmethyl)thio)-1-methylquinoxalin-2(1H)-one (3ai)**

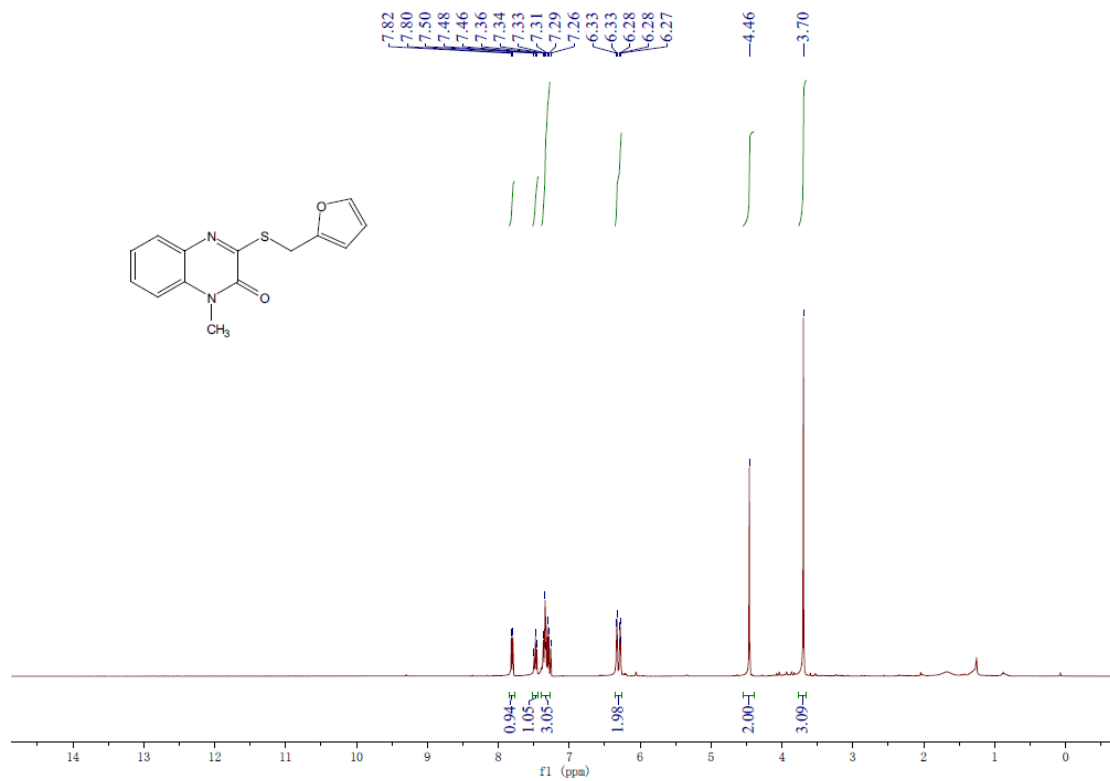

<sup>1</sup>H spectra of **3ai**

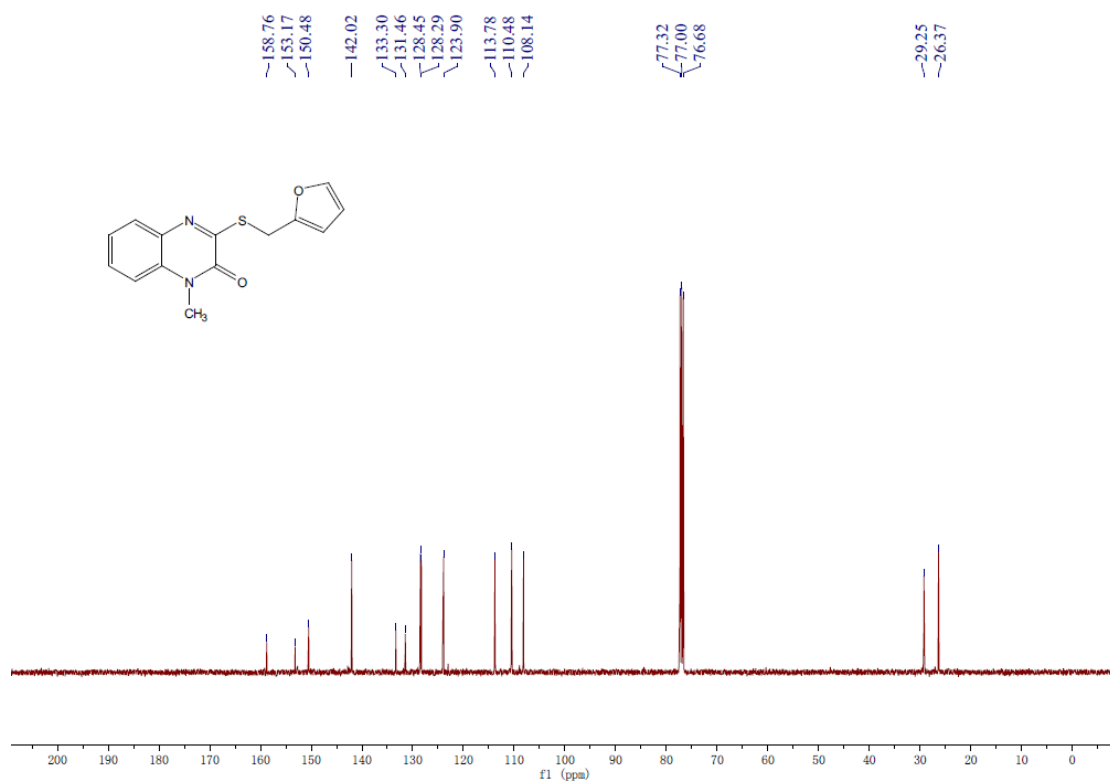

<sup>13</sup>C spectra of **3ai**

**3-(cyclopentylthio)-1-methylquinoxalin-2(1H)-one (3aj)**

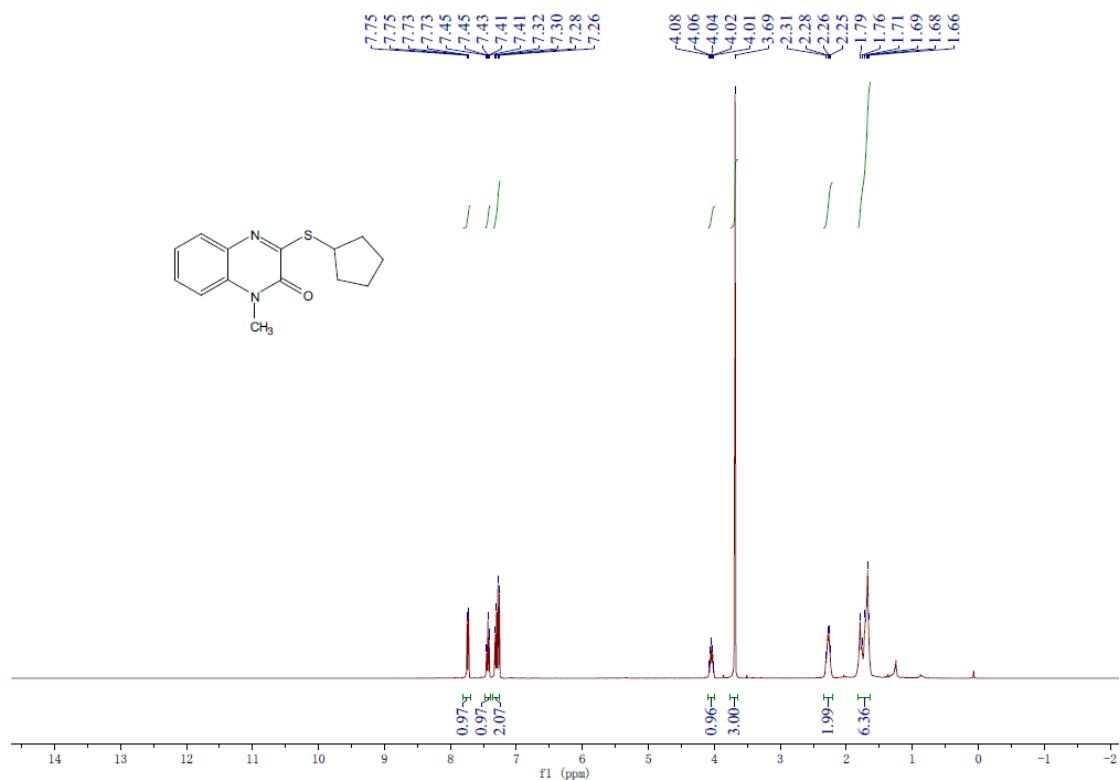

<sup>1</sup>H spectra of 3aj

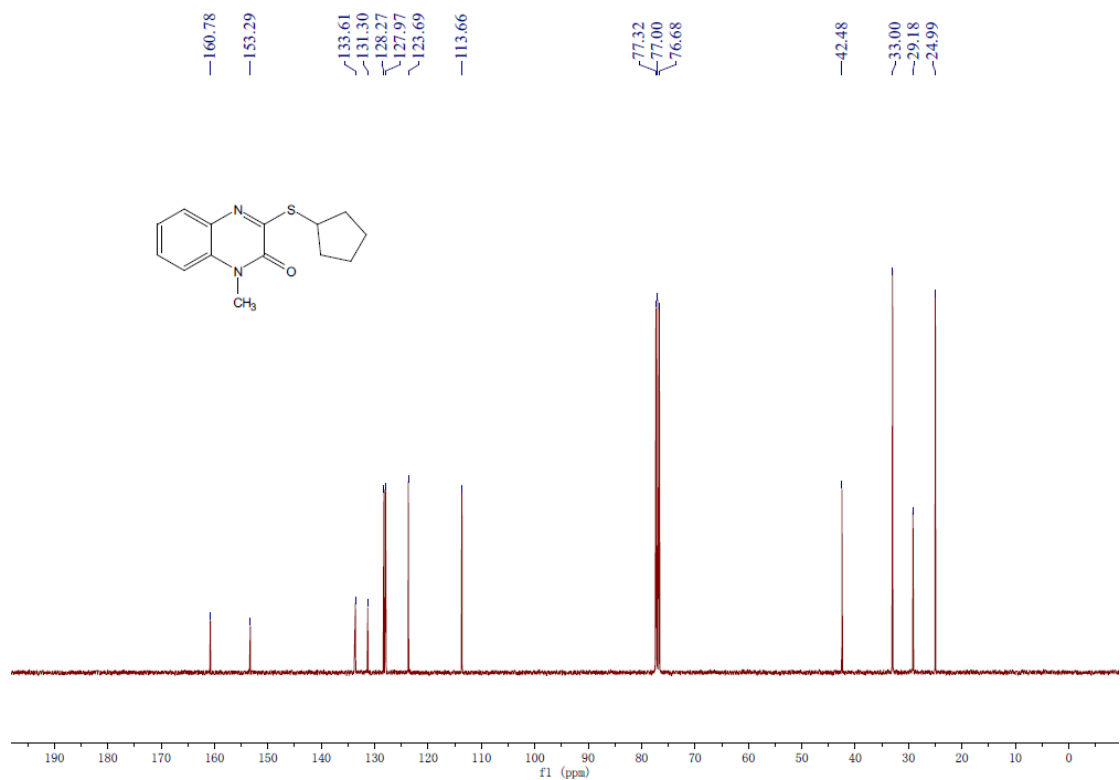

<sup>13</sup>C spectra of 3aj

**3-(cyclohexylthio)-1-methylquinoxalin-2(1H)-one (3ak)**

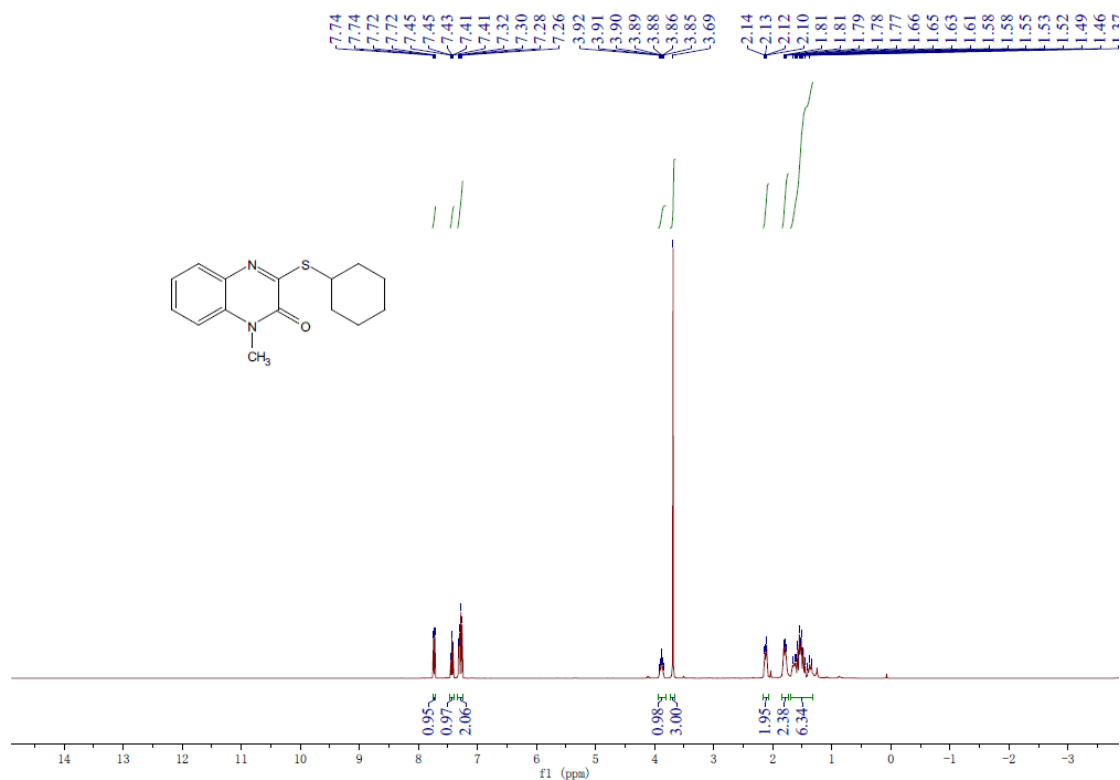

<sup>1</sup>H spectra of **3ak**

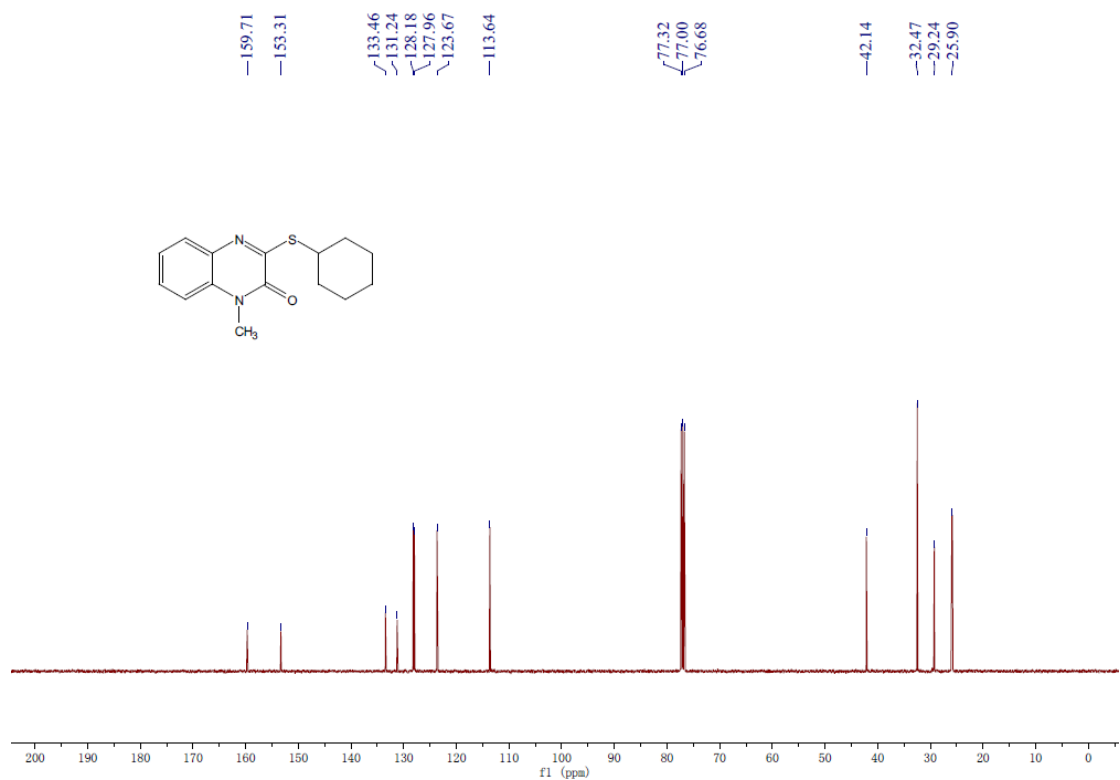

<sup>13</sup>C spectra of **3ak**

**1-methyl-3-((2-methyltetrahydrofuran-3-yl)thio)quinoxalin-2(1H)-one (3al)**

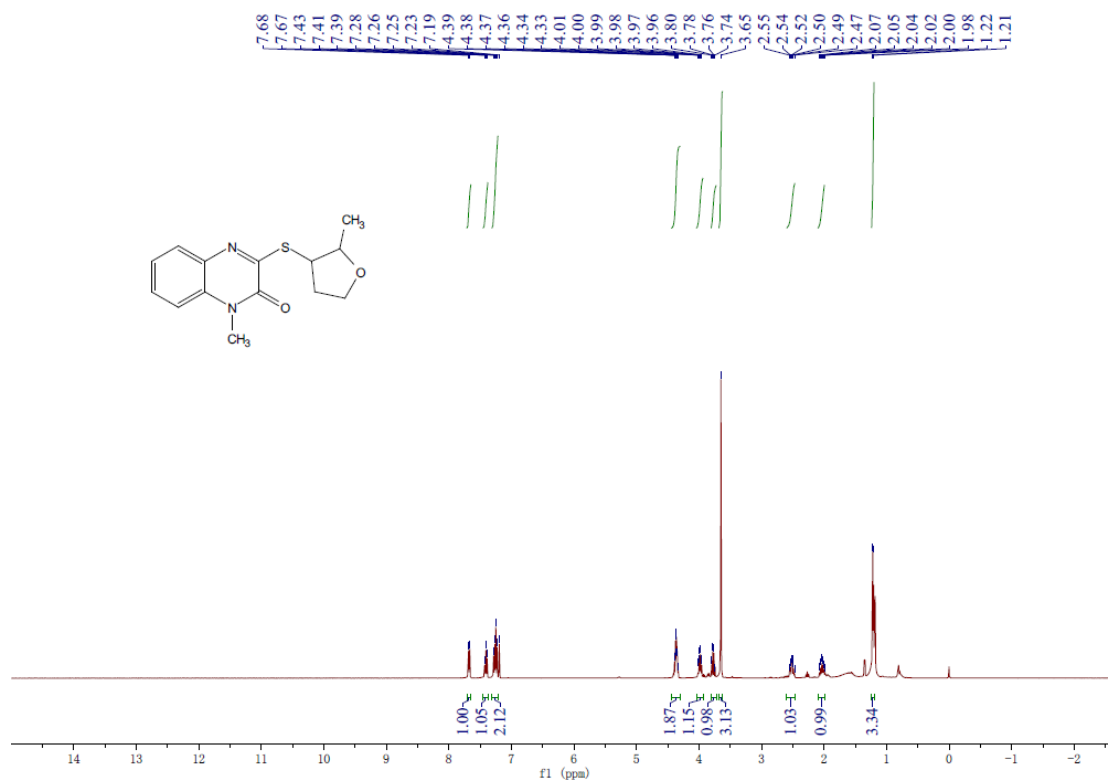

<sup>1</sup>H spectra of **3al**

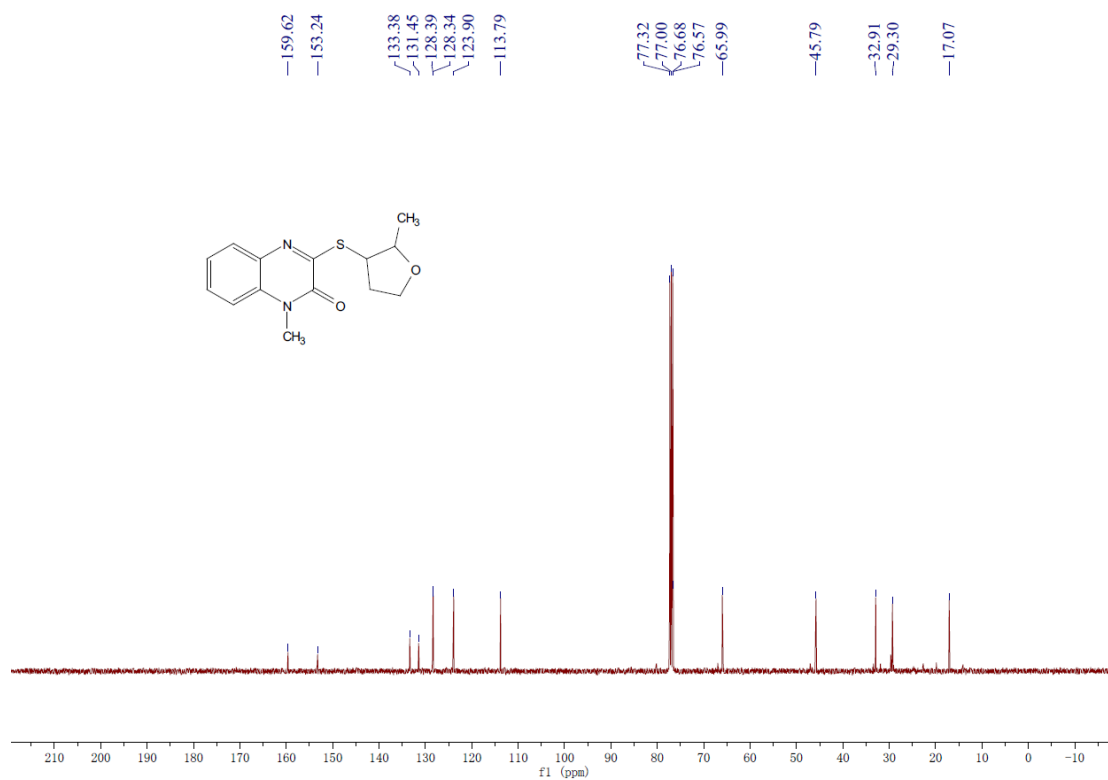

<sup>13</sup>C spectra of **3al**
